1 **KDM2 proteins constrain transcription from CpG island gene promoters**  
2 **independently of their histone demethylase activity**

3 Anne H. Turberfield<sup>1</sup>, Takashi Kondo<sup>2</sup>, Manabu Nakayama<sup>3</sup>, Yoko Koseki<sup>2</sup>, Hamish W. King<sup>1</sup>,  
4 Haruhiko Koseki<sup>2,4</sup>, Robert J. Klose\*<sup>1</sup>

5 <sup>1</sup> Department of Biochemistry, University of Oxford, Oxford, United Kingdom

6 <sup>2</sup> Laboratory for Developmental Genetics, RIKEN Center for Integrative Medical Sciences,  
7 Yokohama, Japan

8 <sup>3</sup> Department of Technology Development, Kazusa DNA Research Institute, Kisarazu, Japan

9 <sup>4</sup> CREST, Japan Science and Technology Agency, Kawaguchi, Japan

10 \*For correspondence: rob.klose@bioch.ox.ac.uk

11

12 **ABSTRACT**

13 CpG islands (CGI) are associated with the majority of mammalian gene promoters and  
14 function to recruit chromatin modifying enzymes. It has therefore been proposed that CGIs  
15 regulate gene expression through chromatin-based mechanisms, however in most cases this  
16 has not been directly tested. Here, we reveal that the histone H3 lysine 36 (H3K36)  
17 demethylase activity of the CGI-binding KDM2 proteins contributes only modestly to the  
18 H3K36me<sub>2</sub>-depleted state at CGI-associated gene promoters and is dispensable for normal  
19 gene expression. Instead, we discover that KDM2 proteins play a widespread and  
20 demethylase-independent role in constraining gene expression from CGI-associated gene  
21 promoters. We further show that KDM2 proteins shape RNA Polymerase II occupancy but not  
22 chromatin accessibility at CGI-associated promoters. Together this reveals a demethylase-  
23 independent role for KDM2 proteins in transcriptional repression and uncovers a new function  
24 for CGIs in constraining gene expression.

25

26 **INTRODUCTION**

27 The functionality of complex multicellular organisms is underpinned by the creation of diverse  
28 cell types from a common genetic DNA blueprint. This is achieved during development by cells  
29 acquiring and maintaining cell type-specific gene expression programmes. At the most basic  
30 level, this relies on the control of RNA polymerase II (RNAPII)-mediated transcription by  
31 transcription factors (Spitz and Furlong 2012). However, it has also become clear that  
32 chromatin structure and its chemical modification can profoundly affect how transcription

33 initiates from promoters and how gene expression is controlled (Kouzarides 2007; Li et al.  
34 2007).

35

36 One such chemical modification of chromatin occurs on DNA where a methyl group is added  
37 to the 5 position of each cytosine in the context of CpG dinucleotides. CpG methylation is  
38 pervasive in mammalian genomes and is generally associated with transcriptional repression,  
39 particularly of repetitive and parasitic DNA elements (Klose and Bird 2006; Schübeler 2015).  
40 However, short CpG-rich regions of the genome, called CpG islands (CGIs), remain free of  
41 DNA methylation and are associated with the majority of mammalian gene promoters  
42 (Saxonov et al. 2006; Illingworth and Bird 2009). CGIs have been proposed to regulate gene  
43 expression (Blackledge and Klose 2011; Deaton and Bird 2011) through a family of ZF-CxxC  
44 DNA binding domain-containing proteins that recognise non-methylated DNA and occupy  
45 CGIs (Voo et al. 2000; Lee et al. 2001; Blackledge et al. 2010; Thomson et al. 2010).  
46 Interestingly, most ZF-CxxC domain-containing proteins possess histone modifying activities  
47 or are part of large chromatin modifying complexes, suggesting that these factors regulate  
48 gene expression through chromatin (Long et al. 2013a). However, in most cases the  
49 contribution of chromatin-based mechanisms to CGI-dependent gene regulation remains  
50 untested.

51

52 The ZF-CxxC domain-containing protein lysine-specific demethylase 2A (KDM2A) and its  
53 paralogue KDM2B bind to CGIs (Blackledge et al. 2010; Farcas et al. 2012; He et al. 2013;  
54 Wu et al. 2013). KDM2 proteins encode a JmjC domain that catalyses the removal of H3K36  
55 mono- and di- methylation (H3K36me<sub>1/2</sub>) (Tsukada et al. 2006; Fang et al. 2007; He et al.  
56 2008; Cheng et al. 2014). H3K36me<sub>1/2</sub> are broadly distributed throughout the mammalian  
57 genome (Peters et al. 2003; Robin et al. 2007; Schotta et al. 2008) and H3K36me<sub>2</sub> has been  
58 proposed to counteract transcription initiation. For example, in yeast H3K36me<sub>2</sub> inhibits  
59 inappropriate initiation of transcription from cryptic promoters in genes (Carrozza et al. 2005;  
60 Joshi and Struhl 2005; Keogh et al. 2005; Li et al. 2009a; McDaniel and Strahl 2017), and this  
61 function may also be conserved in mammals (Xie et al. 2011; Carvalho et al. 2013). Given the  
62 seemingly widespread and indiscriminate deposition of H3K36me<sub>1/2</sub> in mammalian genomes  
63 and its association with transcriptional repression, the discovery that KDM2 proteins localise  
64 specifically to CGIs has led to the suggestion that the removal of H3K36me<sub>2</sub> at these sites  
65 may contribute to a widespread and transcriptionally permissive chromatin state at gene  
66 promoters (Blackledge and Klose 2011; Deaton and Bird 2011). Depletion of KDM2A was  
67 shown to cause an increase in H3K36me<sub>2</sub> at a number of CGI-associated gene promoters,  
68 suggesting that KDM2A plays an active role in H3K36me<sub>2</sub> removal (Blackledge et al. 2010).  
69 However, the histone demethylase activity of KDM2 proteins has also been linked to gene

70 repression, including of genes that have roles in cell proliferation, differentiation and  
71 senescence (Frescas et al. 2007; He et al. 2008; Tzatsos et al. 2009; Tanaka et al. 2010; Du  
72 et al. 2013; Yu et al. 2016). Therefore, the role that KDM2 proteins play in regulating  
73 H3K36me1/2 and the effect that this has on CGI-associated gene transcription remain unclear.

74

75 KDM2 proteins may also regulate transcription through mechanisms that do not rely on their  
76 demethylase activity. KDM2A has been implicated in the formation of pericentromeric  
77 heterochromatin (Borgel et al. 2017), while KDM2B physically associates with polycomb  
78 repressive complex 1 (PRC1) and is required for the formation of repressive polycomb  
79 chromatin domains at a subset of CGI-associated gene promoters (Farcas et al. 2012; He et  
80 al. 2013; Wu et al. 2013; Blackledge et al. 2014). The possibility that KDM2 proteins have  
81 demethylase-independent activity is supported by the observation that the *Kdm2a* and *Kdm2b*  
82 genes encode internal transcription start sites (TSS) downstream of their JmjC domain.  
83 Transcription initiating from these alternative promoters gives rise to short forms of KDM2A  
84 and KDM2B (KDM2A/B-SF, Figure 1A) that lack the JmjC domain and therefore cannot act as  
85 histone demethylases (Tanaka et al. 2010; Long et al. 2013a). Importantly, however, they  
86 retain their ZF-CxxC domain and CGI binding activity. The function of KDM2A/B-SF proteins  
87 remains poorly defined, but there is evidence that the KDM2B-SF is sufficient to recruit PRC1  
88 to chromatin (Blackledge et al. 2014). Following the depletion of either KDM2A or KDM2B,  
89 alterations in gene expression have been reported (Blackledge et al. 2010; Farcas et al. 2012;  
90 He et al. 2013; Blackledge et al. 2014; Boulard et al. 2015). However, whether these two  
91 closely related paralogues function cooperatively to regulate gene expression is unknown and,  
92 like many chromatin modifying enzymes, it remains largely untested whether they rely on their  
93 enzymatic activity for gene regulation. Perhaps more fundamentally, whether the KDM2  
94 proteins function primarily to potentiate or repress gene transcription has not been examined  
95 at the genome-scale and remains a major conceptual barrier in understanding how CGIs,  
96 which are associated with most vertebrate gene promoters, control gene transcription and  
97 expression.

98

99 To address these fundamental questions, here we have exploited systematic conditional  
100 genetic ablation strategies and detailed genome-wide analysis to dissect how KDM2 proteins  
101 regulate H3K36me2 and gene expression in mouse embryonic stem cells (mESCs).  
102 Remarkably, we discover that KDM2 proteins contribute only modestly to the H3K36me2-  
103 depleted state at CGI-associated gene promoters and the demethylase activity of KDM2  
104 proteins is largely dispensable for normal gene expression. In contrast, surgical removal of  
105 the KDM2 ZF-CxxC domains, which liberates KDM2 proteins from CGIs, revealed a  
106 widespread increase in gene expression. This was not limited to the function of KDM2B in

107 polycomb-mediated gene repression, but instead occurred broadly across CGI-associated  
108 genes, revealing an unexpectedly widespread role for KDM2 proteins in constraining gene  
109 expression. KDM2B plays the predominant role in gene repression, while KDM2A appears to  
110 cooperate with KDM2B to counteract expression at a subset of genes. KDM2-dependent  
111 effects on gene expression do not manifest through altered DNA accessibility at CGIs, but  
112 instead appear to regulate RNAPII occupancy at gene promoters. Therefore, we define a new  
113 demethylase-independent role for KDM2A/B in transcriptional repression, uncovering a new  
114 logic whereby CGIs appear, unexpectedly, to constrain gene expression.

115

## 116 RESULTS

### 117 KDM2 proteins contribute modestly to the H3K36me2-depleted state at CGI- 118 associated gene promoters

119 KDM2A and KDM2B both catalyse H3K36me2 demethylation via their JmjC domain (Tsukada  
120 et al. 2006; He et al. 2008) and localise to CGIs via their ZF-CxxC domain (Figure 1A)  
121 (Blackledge et al. 2010; Farcas et al. 2012; He et al. 2013; Wu et al. 2013). However, whether  
122 KDM2 proteins regulate H3K36me2 at CGI-associated gene promoters throughout the  
123 genome has not been examined. Therefore, we generated a mESC system in which loxP sites  
124 were inserted into the *Kdm2a* and *Kdm2b* genes flanking exons that encode the JmjC domain  
125 (*Kdm2a/b-JmjC<sup>fl/fl</sup>*, Supplementary Figure 1A) and which also expresses a tamoxifen-inducible  
126 form of CRE recombinase. Addition of tamoxifen triggers deletion of the JmjC domain-  
127 containing exons, removing the long forms of KDM2A and KDM2B (KDM2-LFs) and their  
128 associated demethylase activity (Figure 1B,C, Supplementary Figure 1B). Importantly, KDM2-  
129 SFs, which are expressed from downstream promoters (Supplementary Figure 1A), were  
130 unaffected by removal of the KDM2-LFs (Figure 1 B,C). We first investigated the contribution  
131 of KDM2-LFs to global H3K36 methylation levels by western blot, and observed only minor  
132 changes following removal of KDM2-LFs (Supplementary Figure 1C,D). Next, we examined  
133 the genome-wide distribution of H3K36me2 using chromatin immunoprecipitation followed by  
134 massively-parallel sequencing (ChIP-seq). This confirmed a local depletion of H3K36me2 at  
135 CGI-associated gene promoters (Figure 1D,E) (Blackledge et al. 2010; Blackledge and Klose  
136 2011; Deaton and Bird 2011). H3K36me2 depletion was not detected at non-CGI gene  
137 promoters, demonstrating that this is a CGI-associated chromatin feature. Following removal  
138 of the KDM2-LFs by tamoxifen treatment, there was a modest increase in H3K36me2 at the  
139 TSS of CGI-associated gene promoters (Figure 1D,E). This demonstrates that KDM2A/B  
140 contribute to the H3K36me2-depleted state at CGIs, in agreement with single-gene studies  
141 examining the KDM2A- or KDM2B-depleted state (Blackledge et al. 2010). Interestingly,

142 intragenic CGIs were also depleted of H3K36me2 (Figure 1F), although this depletion was on  
143 average less pronounced than at CGI promoters, likely due to their lower average CpG density  
144 and size (Supplementary Figure 1E). Importantly, removal of the KDM2-LFs resulted in an  
145 increase in H3K36me2 at intragenic CGIs indicating that their H3K36me2 depleted state is  
146 also shaped by KDM2A/B.

147 Our ChIP-seq analysis revealed that KDM2-LFs contribute to the H3K36me2-depleted state  
148 at CGI-associated promoters. However, we were curious whether the effects on H3K36me2  
149 were uniformly distributed or dependent on other features of gene promoters, such as  
150 transcriptional activity. Therefore, we separated genes based on expression level  
151 (Supplementary Figure 1F) and examined H3K36me2 at genes and surrounding regions. This  
152 revealed that CGI-associated TSSs were depleted of H3K36me2 irrespective of expression  
153 level (Figure 1G). Chromatin surrounding CGI-associated TSSs was blanketed by H3K36me2,  
154 consistent with this modification being pervasive in mammalian genomes. The increase in  
155 H3K36me2 at the TSS following KDM2-LF removal was similar across all expression levels  
156 (Figure 1H), consistent with the transcription-independent targeting of KDM2 proteins to CGI  
157 promoters via their ZF-CxxC domains. Interestingly, highly transcribed genes were also  
158 depleted of H3K36me2 in their gene body (Figure 1G). However, this was independent of  
159 KDM2 demethylase activity and instead correlated with co-transcriptional conversion of  
160 H3K36me2 to H3K36me3 (Figure 1I) (Bannister et al. 2005; Pokholok et al. 2005; Barski et al.  
161 2007; Bell et al. 2007; Mikkelsen et al. 2007; Weiner et al. 2015). Together, these observations  
162 reveal that KDM2 proteins remove H3K36me2 from CGIs, but unexpectedly their contribution  
163 to the depletion of H3K36me2 at these sites is modest. This suggests that CGIs could be  
164 inherently refractory to H3K36me2 or that additional H3K36 demethylases may also function  
165 at these regions (see discussion).

166

## 167 **KDM2 demethylase activity contributes minimally to gene regulation**

168 Depletion of H3K36me2 at CGI-associated gene promoters has been proposed to contribute  
169 to the generation of a transcriptionally permissive chromatin state (Blackledge et al. 2010;  
170 Blackledge and Klose 2011; Deaton and Bird 2011). Although KDM2 proteins appear to  
171 contribute only modestly to the H3K36me2-depleted state at CGIs (Figure 1), we were curious  
172 whether this effect was nevertheless required to sustain normal chromatin accessibility and  
173 transcription from CGI-associated gene promoters. To address these questions, we first  
174 performed calibrated ATAC-seq (cATAC-seq) to measure chromatin DNA accessibility before  
175 and after removal of KDM2-LFs. This demonstrated that CGI promoters remained accessible,  
176 despite the observed increases in H3K36me2 (Figure 2A). To examine gene expression, we

177 performed calibrated nuclear RNA sequencing (cnRNA-seq). This revealed that the  
178 expression of the vast majority of genes did not change following removal KDM2 demethylase  
179 activity, with only a small number of genes being modestly perturbed (Figure 2B). Furthermore,  
180 there was a poor correlation between gene expression changes and the effects on H3K36me2  
181 at gene promoters (Figure 2C,D). This minimal perturbation to gene expression and chromatin  
182 accessibility following loss of KDM2-LFs indicates that histone demethylase activity of KDM2  
183 proteins is largely dispensable for normal CGI-associated promoter activity.

184

## 185 **KDM2 proteins play a widespread role in gene repression**

186 Given that gene expression was largely unaffected when KDM2 demethylase activity was  
187 removed, we wondered whether demethylase-independent activities of KDM2 proteins may  
188 play a more prominent role in gene regulation. KDM2A and KDM2B encode multiple isoforms,  
189 each of which contain the ZF-CxxC DNA binding domain. Therefore, to remove all CGI-  
190 targeted KDM2 proteins, we developed a conditional mESC system in which the exon  
191 encoding the ZF-CxxC domain is flanked by loxP sites in both *Kdm2a* and *Kdm2b* genes  
192 (*Kdm2a/b-CXXC<sup>fl/fl</sup>*), and which expresses tamoxifen-inducible Cre recombinase  
193 (Supplementary Figure 3A). Following addition of tamoxifen the ZF-CxxC-encoding exons are  
194 excised, producing KDM2A and KDM2B proteins that now lack the ZF-CxxC domain (Figure  
195 3A). The effectiveness of this approach was evident from the loss of the ZF-CxxC domain and  
196 an increased mobility of the KDM2 proteins in western blot analysis (Figure 3B) and from loss  
197 of binding to CGIs in ChIP analysis (Supplementary Figure 3B).

198 To examine whether this loss of CGI binding had an effect on gene expression, we carried out  
199 cnRNA-seq and compared gene expression between untreated and tamoxifen treated cells.  
200 This revealed that KDM2 protein removal resulted in more than a fifth of all genes showing  
201 significantly increased expression (Figure 3C,D). Owing to the quantitative nature of cnRNA-  
202 seq it was also apparent that KDM2 protein removal led to a more general increase in gene  
203 expression, even amongst genes that were not considered significantly changed by statistical  
204 analysis (Figure 3E). We validated these widespread effects using highly sensitive and  
205 quantitative digital droplet PCR analysis (Supplementary Figure 3C). Importantly, our capacity  
206 to uncover this broad increase in gene expression was only possible due to the use of  
207 calibrated nuclear RNA-seq (cnRNA-seq) as conventional normalisation based on total read  
208 count fails to uncover this pervasive alteration in gene expression (Supplementary Figure 3D).  
209 When we examined in more detail the transcripts with significantly increased expression these  
210 were enriched for CGI-associated genes (Figure 3F), consistent with these effects being a  
211 direct result of KDM2 protein removal as opposed to a global perturbation of some core



212 transcriptional component. In contrast, significantly downregulated genes were less numerous  
213 and not enriched for CGI-associated genes, suggesting they may correspond to secondary  
214 effects. Together, these observations establish an unexpected and widespread role for KDM2  
215 proteins in suppressing expression from CGI-associated gene promoters.

216

## 217 **Elevated gene expression following KDM2 protein removal is not simply a** 218 **consequence of polycomb target gene reactivation**

219 We have previously shown that KDM2B plays an important role in recruiting the PRC1  
220 complex to CGI-associated gene promoters in mESCs. It does so by interacting with the PRC1  
221 complex via the specialised adaptor protein PCGF1 which links KDM2B to RING1B, the  
222 catalytic core of PRC1 (Farcas et al. 2012; He et al. 2013; Wu et al. 2013; Blackledge et al.  
223 2014). When we examined the genes that increased in gene expression following KDM2  
224 protein removal they had stereotypical CGI-associated features (Figure 4A), but were also  
225 enriched for KDM2B, RING1B and SUZ12. This raised the possibility that the observed effects  
226 on gene expression following KDM2 protein removal simply resulted from loss of KDM2B-  
227 dependent targeting and gene repression by the PRC1 complex. To investigate this possibility,  
228 we compared the gene expression changes following KDM2 protein removal with those  
229 following conditional removal of PCGF1 (Fursova 2019). This revealed that removal of PCGF1  
230 caused de-repression of more than four times fewer genes than removal of KDM2 proteins  
231 (Figure 4B). Furthermore, genes that significantly increased in expression following PCGF1  
232 removal were more strongly enriched for polycomb target genes than those that significantly  
233 increased following KDM2 removal (Figure 4C). Genes showing increased expression  
234 following PCGF1 removal were a subset of those showing increased expression following  
235 KDM2 protein removal (Figure 4D), and there was only a moderate positive correlation  
236 between the gene expression changes in these lines (Supplementary Figure 4A). These  
237 observations indicate that a small proportion of the gene de-repression events in cells where  
238 KDM2 proteins are removed are related to the activity of the KDM2B-PRC1 complex.

239 Building on this important observation, we examined in more detail the gene expression  
240 changes that manifest from KDM2 protein removal from CGIs. From this it was evident that  
241 genes with low starting expression level more strongly increased in expression, including non-  
242 polycomb target genes (Figure 4E). Gene ontology analysis revealed that genes that  
243 significantly increased in expression were enriched for a variety of developmental terms  
244 (Figure 4F), consistent with some of the effects being related to the polycomb system, but also  
245 a variety of basic cellular processes that are unrelated (Figure 4G). This reflects the  
246 generalised increase in gene expression that occurs following KDM2 removal. Together, these

247 observations reveal that KDM2 proteins play a widespread role in gene repression from CGI-  
248 associated gene promoters and do so largely through mechanisms that are independent of  
249 the polycomb repressive system.

250

## 251 **KDM2B plays the predominant role in gene repression**

252 Loss of both KDM2A and KDM2B from CGI chromatin simultaneously resulted in widespread  
253 increases in gene expression (Figure 3). However, it was unclear from these experiments  
254 whether KDM2A, KDM2B or both contribute to gene repression. To examine this question, we  
255 developed a conditional mESC system in which we could remove KDM2A alone by tamoxifen-  
256 induced deletion of its ZF-CxxC domain (*Kdm2a-CXXC<sup>fl/fl</sup>*, Figure 5A, Supplementary Figure  
257 5A and see Supplementary Figure 3A). cnRNA-seq revealed that removal of KDM2A led to  
258 virtually no changes in gene expression (Figure 5B), indicating that KDM2A alone is not  
259 required to maintain normal gene expression in mESCs. We next investigated the contribution  
260 of KDM2B to the regulation of gene expression, performing cnRNA-seq using a *Kdm2b-*  
261 *CXXC<sup>fl/fl</sup>* mESC line (Blackledge et al. 2014)(Figure 5A, Supplementary Figure 5B). cnRNA-  
262 seq revealed that removal of KDM2B alone was sufficient to cause increases in the expression  
263 of thousands of genes (Figure 5B) and, unlike KDM2A removal, largely recapitulated the  
264 widespread increases in gene expression that occurred following KDM2A/B removal (Figure  
265 5C). Genes that significantly increased in expression following KDM2B removal were enriched  
266 for CGI-associated genes (Figure 5D). Furthermore, gene ontology analysis revealed that  
267 these significantly increasing genes were enriched for a variety of developmental terms  
268 characteristic of polycomb target genes (Figure 5E) but also terms relating to basic cellular  
269 processes (Figure 5F). These observations suggest that removal of KDM2B alone, like  
270 removal of KDM2A/B together, leads to widespread increases in the expression of CGI-  
271 associated genes.

272 A comparison of the gene expression changes following KDM2B removal alone and KDM2A/B  
273 removal together revealed good overall correlation (Figure 5G), indicating that the gene  
274 expression changes following KDM2B removal largely recapitulated those following removal  
275 of KDM2A/B together. However, a more detailed analysis revealed 931 significantly increasing  
276 genes that less strongly increased in expression following loss of KDM2B compared to  
277 KDM2A/B together, and this set was enriched for genes with low expression level (Figure 5H).  
278 This suggests that KDM2A plays a role in restricting the expression of these genes following  
279 KDM2B removal. Together our findings demonstrate that KDM2B plays the predominant role  
280 in repressing gene expression, while KDM2A may cooperate with KDM2B to counteract  
281 expression at a subset of genes.



282

283 **KDM2 proteins regulate polymerase occupancy but not chromatin accessibility at CGIs**

284 Gene regulatory elements and gene promoters are characterised by elevated chromatin  
285 accessibility (Boyle et al. 2008; Song et al. 2011; Thurman et al. 2012), and this is thought to  
286 play an important role in regulating gene expression. Accessibility at CGI-associated gene  
287 promoters broadly correlates with transcriptional output, with the promoters of highly  
288 transcribed CGI-associated genes being more highly accessible (King et al. 2018). Therefore  
289 we wondered whether the increases in gene expression following removal of KDM2 proteins  
290 resulted from increases in the accessibility at CGI-associated gene promoters in the absence  
291 of KDM2A/B. To test this we carried out cATAC-seq following removal of KDM2 proteins.  
292 Importantly, we did not observe any significant change in the accessibility of CGI-associated  
293 gene promoters (Figure 6A, Supplementary Figure 6A), indicating that expression changes  
294 must manifest through effects on transcription that are independent of chromatin accessibility.

295 To examine this possibility in more detail, we carried out cChIP-seq for RNAPII before and  
296 after removal of KDM2 proteins. This revealed on average a widespread decrease in RNAPII  
297 occupancy at the TSSs of CGI-associated genes (Figure 6B,C). In the gene body, alterations  
298 in RNAPII occupancy appeared to be related to the level of RNAPII reduction at the gene  
299 promoter. Genes that retained promoter associated RNAPII showed increased RNAPII in the  
300 gene body and promoters showing reduced RNAPII levels also had moderately reduced  
301 RNAPII in the gene body (Figure 6D). Importantly, these effects were restricted to CGI-  
302 associated genes, in agreement with the function of KDM2A/B at CGIs. To examine in more  
303 detail the nature of the defects in RNAPII function at CGI-associated gene promoters, we  
304 calculated the RNAPII pausing index, which is often used a proxy for RNAPII pause-release  
305 (Supplementary Figure 6B). This showed a modest but clear decrease in pausing index when  
306 KDM2 proteins were removed, and importantly this effect was not observed for non-CGI-  
307 associated genes (Figure 6E). This suggests that removal of KDM2 proteins may contribute  
308 to an increased rate of RNAPII pause release from CGI-associated gene promoters. A  
309 comparison of the changes in RNAPII occupancy with the gene expression changes following  
310 KDM2 removal revealed a moderate positive correlation (Supplementary Figure 6C), such that  
311 the genes that most strongly increased in expression retained RNAPII at their promoter and  
312 had elevated RNAPII occupancy throughout the gene body (Supplementary Figure 6D,E).  
313 These effects on RNAPII could be explained by an increase in the rate of transcription initiation  
314 at genes that show large increases in expression which, when combined with an increased  
315 rate of pause release, results in the accumulation of RNAPII throughout the gene body and  
316 increases in transcript levels. Importantly, the change in the distribution of Ser5-

317 phosphorylated RNAPII, which is enriched at promoter regions, and Ser2-phosphorylated  
318 RNAPII, which is enriched throughout gene bodies, resembled that of total RNAPII  
319 (Supplementary Figure 6F). There was no obvious shift in the position of either Ser2- or Ser5-  
320 phosphorylated RNAPII enrichment throughout CGI genes (Figure 6F), and only minor  
321 changes in the relative enrichment of Ser5- or Ser2-phosphorylated RNAPII compared to total  
322 RNAPII at CGI gene promoters and gene bodies, respectively (Figure 6G). Together our  
323 findings suggest that KDM2 proteins play a role in regulating RNAPII activity at gene  
324 promoters, potentially by limiting initiation and pause release to constrain productive  
325 transcription from these regions of the genome.

326

## 327 **DISCUSSION**

328 Chromatin modifying complexes are thought to play central roles in regulating gene expression  
329 through their enzymatic activities. Yet, for most of these complexes, the importance of their  
330 histone modifying activities in gene regulation remains to be tested. KDM2 histone  
331 demethylases have been proposed to contribute to an H3K36me2-depleted and  
332 transcriptionally permissive chromatin state at CGI-associated gene promoters. Alternatively,  
333 they have also been suggested to contribute to gene repression in some specific instances.  
334 However, the extent to which KDM2 proteins regulate gene expression and how this is related  
335 to their H3K36me2 demethylase activity has remained untested. Here, using combinatorial  
336 genetic perturbation and detailed genome-wide approaches, we discover that the histone  
337 demethylase activity of KDM2 proteins contributes modestly to the H3K36me2 depletion at  
338 CGI-associated gene promoters (Figure 1) and has minimal effects on gene expression  
339 (Figure 2). In contrast, using calibrated gene expression analysis we discover an unexpectedly  
340 widespread histone demethylase-independent role for KDM2 proteins in constraining the  
341 expression of CGI-associated genes (Figure 3). Importantly, repression by KDM2 proteins is  
342 not limited to polycomb target genes, which are known to be regulated by the KDM2B-PRC1  
343 complex (Figure 4). Nevertheless, we find that KDM2B plays the predominant role in  
344 repressing expression, while KDM2A appears to contribute at a subset of genes (Figure 5).  
345 Finally, the effects of KDM2 proteins on gene expression are not mediated through changes  
346 in chromatin accessibility, but instead KDM2 proteins appear to play a role in constraining  
347 RNAPII occupancy and possibly pause release at CGI-associated gene promoters to limit  
348 transcription (Figure 6). Together, this demonstrates that KDM2 proteins regulate gene  
349 expression independently of their histone demethylase activity and through mechanisms that  
350 appear to regulate RNAPII function at CGI-associated gene promoters. These discoveries

351 reveal an interesting new chromatin modification-independent role for CGIs and the KDM2  
352 proteins in constraining gene expression.

353 Our understanding of how histone modification states are specified and regulated remains  
354 poorly understood. In the context of histone H3K36, NSD1-3 and ASH1L, the main  
355 H3K36me1/2 methyltransferases, can associate with gene promoters and genic regions, and  
356 H3K36me2 blankets most of the genome (Gregory et al. 2007; Lucio-Eterovic et al. 2010; Kuo  
357 et al. 2011; Rahman et al. 2011; Ram et al. 2011; Shen et al. 2015). However, our genome-  
358 wide profiling of H3K36me2 reveals that the bodies of highly transcribed genes and CGI-  
359 associated gene promoters are exceptions to this, being uniquely depleted of H3K36me2. This  
360 suggests that mechanisms must function to shape H3K36me2 at distinct regions of the  
361 genome. The depletion of H3K36me2 in highly transcribed gene bodies is likely due to  
362 conversion to H3K36me3 by the SETD2 protein, which interacts with RNAPII and functions as  
363 an H3K36 trimethyltransferase in gene bodies during transcriptional elongation (Strahl et al.  
364 2002; Krogan et al. 2003; Li et al. 2003; Schaft et al. 2003; Xiao et al. 2003; Kizer et al. 2005;  
365 Li et al. 2005; Sun et al. 2005; Edmunds et al. 2008). We and others had previously proposed  
366 that the H3K36me2-depleted state at CGI-associated gene promoters relies on KDM2 proteins  
367 to actively remove H3K36me2 from these regions. Now, using a cell system where we can  
368 induce the removal of KDM2 demethylase activity, we show that KDM2 enzymes contribute  
369 modestly to depletion of H3K36me2 at CGI-associated gene promoters. This suggests that  
370 the activity of NSD/ASH1L may be inhibited, or that other histone demethylases may  
371 compensate for the loss of KDM2 enzymes, at these regions of the genome. The latter of  
372 these two possibilities seems the most likely, as KDM4A-C demethylases catalyse the removal  
373 of H3K36me2/3 (Cloos et al. 2006; Fodor et al. 2006; Klose et al. 2006; Whetstine et al. 2006)  
374 and also associate broadly with gene promoters (Pedersen et al. 2014; Pedersen et al. 2016).  
375 Therefore, determining whether the H3K36me2-depleted state at CGI-associated gene  
376 promoters results from active removal of this modification and contributes to gene regulation  
377 awaits combinatorial removal of KDM2 and KDM4 demethylase activity.

378 When studied in the context of individual genes, KDM2A and KDM2B have been proposed to  
379 function in both gene activation and repression. However, which of these activities is most  
380 prevalent and whether these paralogous proteins function together to achieve appropriate  
381 gene regulation have remained unknown. Using combinatorial inducible genetic perturbation  
382 strategies and calibrated RNA-seq we now reveal that KDM2 proteins function primarily as  
383 repressors of gene expression and elicit their effects via a demethylase-independent  
384 mechanism. Gene repression by KDM2 proteins is remarkably widespread but largely  
385 restricted to CGI-associated genes, in agreement with the occupancy of KDM2 proteins at  
386 these regions of the genome through their ZF-CxxC DNA binding domain. However, lowly

387 expressed genes were more susceptible to increases in gene expression when KDM2 proteins  
388 were removed. Therefore, KDM2 proteins may function to generically constrain transcription  
389 from CGI-associated gene promoters, but only function to counteract low-level activation  
390 signals. In agreement with this suggestion, CGI-associated genes that are already highly  
391 expressed are largely unaffected by KDM2 loss, despite the fact that KDM2 proteins occupy  
392 their promoters. In the context of these observations, we propose that the repressive activity  
393 of KDM2 proteins may effectively create a CGI-imposed barrier to gene activation which  
394 protects against low-level or inappropriate gene activation signals. This could be particularly  
395 important in the context of cellular differentiation where excessive gene expression noise or  
396 precocious gene activation may have deleterious consequences for the highly orchestrated  
397 cascade of gene expression events that lead to appropriate acquisition of new cell fates.

398 Gene repression by the KDM2 proteins occurs independently of their JmjC domain and histone  
399 demethylase activity, raising the interesting question of how they repress gene expression. By  
400 examining the binding of RNAPII and its modified forms throughout the genome following loss  
401 of KDM2 proteins, we discover that there is a widespread reduction in RNAPII occupancy at  
402 CGI-associated gene promoters. This suggests that one activity of KDM2 proteins at CGIs  
403 may be to constrain productive transcription, perhaps through a process that directly regulates  
404 RNAPII pause release. It is intriguing to note that, on average, RNAPII occupancy moderately  
405 decreased in gene bodies following loss of KDM2 proteins, despite a widespread increase in  
406 gene expression. This raises the possibility that there are further alterations to RNAPII  
407 behaviour, such as elongation rate, following KDM2 removal. Based on these observations,  
408 an important area of future work will be to examine the mechanisms by which KDM2 proteins  
409 affect RNAPII activity and to determine how direct this is.

410 We speculate that one mechanism by which KDM2 proteins could potentially modulate  
411 RNAPII-dependent transcription processes is through ubiquitination. This is because, in  
412 addition to their JmjC domains, KDM2 proteins also encode FBOX and LRR domains. The  
413 FBOX binds a protein called SKP1, and we and others have previously shown that KDM2A  
414 and KDM2B both interact with SKP1 (Gearhart et al. 2006; Koyama-Nasu et al. 2007; Farcas  
415 et al. 2012; Tan et al. 2013). SKP1 is a central component of SCF-type E3 ubiquitin ligase  
416 complexes (Cardozo and Pagano 2004), while FBOX-containing proteins are thought to confer  
417 substrate specificity for SCF complexes through additional domains such as the LRR domain  
418 (Ho et al. 2006). This suggests that KDM2 proteins might identify target proteins for  
419 ubiquitylation. Indeed, KDM2B was reported to ubiquitylate the transcription factor c-Fos,  
420 leading to its degradation by the proteasome (Han et al. 2016). KDM2A has also been  
421 proposed to possess E3 ligase activity, as its overexpression stimulates 53BP1 ubiquitylation  
422 (Bueno et al. 2018). The specificity of these putative KDM2 E3 ubiquitin ligase complexes

423 remains to be investigated. However, given that KDM2 proteins act broadly to repress gene  
424 expression and may regulate RNAPII activity, one might envisage that KDM2 proteins could  
425 regulate a component of the core transcriptional machinery or another general modulator of  
426 gene transcription. Therefore, in future work it will be interesting to explore whether KDM2  
427 proteins have a role in proteostasis at CGIs and to understand whether this contributes to their  
428 function in the repression of gene expression and the regulation of RNAPII activity.

429 In conclusion, we discover that KDM2 proteins are CGI-specific transcriptional repressors that  
430 appear to function to constrain low-level gene activation signals. Interestingly, DNA situated  
431 in CGIs is known to be highly accessible, differentiating it from much of the rest of the genome.  
432 It has been proposed that this accessibility highlights the location of gene regulatory elements  
433 within large and complex vertebrate genomes, and allows transcriptional regulators and the  
434 transcriptional machinery to more easily access the underlying DNA and enable gene  
435 expression. However, an unintended consequence of this CGI-associated accessibility may  
436 be that it renders these regions susceptible to low-level and potentially inappropriate gene  
437 activation signals. We speculate that, in response to this potentially deleterious side effect of  
438 CGI accessibility, KDM2 proteins may have evolved to bind CGIs and constrain transcription.  
439 Indeed, we show that loss of KDM2 proteins does not affect accessibility at CGIs but does  
440 broadly affect gene expression and RNAPII occupancy. Therefore we propose that CGIs  
441 create an appropriate balance of transcriptionally permissive and restrictive activities to help  
442 control gene expression.

443

## 444 **FIGURE LEGENDS**

445 **Figure 1 – KDM2 proteins contribute modestly to the H3K36me2-depleted state at CGI-**  
446 **associated gene promoters.**

447 (A) A schematic illustrating protein domain architecture for KDM2A/B long (LF) and short  
448 isoforms (SF).

449 (B) A schematic of the *Kdm2a/b-Jmjc<sup>fl/fl</sup>* system in which addition of tamoxifen (OHT) leads  
450 to removal of KDM2 long isoforms.

451 (C) Western blot analysis for KDM2A and KDM2B in *Kdm2a/b-Jmjc<sup>fl/fl</sup>* mESCs before  
452 (UNT) and after 96 hours of tamoxifen (OHT) treatment. BRG1 is shown as a loading  
453 control for both blots. Asterisks indicate non-specific bands.

454 (D) Heatmaps of H3K36me2 enrichment (ChIP-seq) in *Kdm2a/b-Jmjc<sup>fl/fl</sup>* mESCs before  
455 (UNT) and after addition of tamoxifen (OHT), for CGI-associated (n=14106) and non-



- 456 CGI-associated (n=6527) gene promoters. H3K36me2 signal was normalised to H3  
457 ChIP-seq to control for any alterations in nucleosome density.
- 458 (E) A metaplot of normalised H3K36me2 ChIP-seq signal at CGI-associated or non-CGI-  
459 associated gene promoters in *Kdm2a/b-JmjC<sup>fl/fl</sup>* mESCs, before (UNT) and after  
460 tamoxifen treatment (OHT).
- 461 (F) A metaplot of normalised H3K36me2 ChIP-seq signal at intragenic CGIs in *Kdm2a/b-*  
462 *JmjC<sup>fl/fl</sup>* mESCs, before (UNT) and after tamoxifen treatment (OHT).
- 463 (G) Metaplots showing normalised H3K36me2 ChIP-seq signal throughout the gene body  
464 before (UNT) and after tamoxifen treatment (OHT), for CGI-associated genes  
465 separated into quartiles according to their expression level in *Kdm2a/b-JmjC<sup>fl/fl</sup>* mESCs  
466 (Q1 < Q2 < Q3 < Q4). Genes were scaled to the same length and aligned at their TSS  
467 and TES.
- 468 (H) A boxplot showing fold change in normalised H3K36me2 ChIP-seq signal following  
469 tamoxifen treatment, for the CGI-associated gene quartiles shown in (G) and for non-  
470 CGI-associated genes.
- 471 (I) A metaplot showing H3K36me3 enrichment throughout the gene body for the gene  
472 sets shown in (G) (Brookes et al. 2012).

473

474 **Figure 2 – KDM2 demethylase activity contributes minimally to gene regulation.**

- 475 (A) An MA-plot showing log<sub>2</sub> fold change in the accessibility (cATAC-seq) of CGI-  
476 associated gene promoters in *Kdm2a/b-JmjC<sup>fl/fl</sup>* mESCs following tamoxifen treatment.  
477 No promoters significantly changed in accessibility (p-adj < 0.05 and > 1.4-fold).
- 478 (B) An MA-plot showing log<sub>2</sub> fold change in gene expression (cnRNA-seq) in *Kdm2a/b-*  
479 *JmjC<sup>fl/fl</sup>* mESCs following tamoxifen treatment. The number of genes with significantly  
480 increased or decreased expression (p-adj < 0.05 and > 1.4-fold) is shown in red and  
481 density of gene expression changes is shown on the right.
- 482 (C) A scatter plot comparing the log<sub>2</sub> fold change in gene expression (cnRNA-seq) with  
483 the log<sub>2</sub> fold change in normalised H3K36me2 ChIP-seq signal for CGI-associated  
484 genes following tamoxifen treatment of *Kdm2a/b-JmjC<sup>fl/fl</sup>* mESCs. The solid line shows  
485 the linear regression, and the coefficient of determination (R<sup>2</sup>) and Spearman  
486 correlation coefficient (Cor) are annotated.
- 487 (D) Boxplots showing the log<sub>2</sub> fold change in cnRNA-seq signal (left) and normalised  
488 H3K36me2 ChIP-seq signal (right) for CGI-associated genes grouped into quintiles  
489 based on their change in expression following tamoxifen treatment of *Kdm2a/b-JmjC<sup>fl/fl</sup>*  
490 mESCs.

491

492 **Figure 3 – KDM2 proteins mediate widespread gene repression.**

- 493 (A) A schematic of the *Kdm2a/b-CXXC<sup>fl/fl</sup>* system in which addition of tamoxifen (OHT)  
494 leads to the generation of KDM2 proteins that lack the ZF-CxxC domain and therefore  
495 are unable to bind to chromatin.
- 496 (B) Western blot analysis for KDM2A and KDM2B in *Kdm2a/b-CXXC<sup>fl/fl</sup>* mESCs before  
497 (UNT) and after 96 hours tamoxifen (OHT) treatment. BRG1 is shown as a loading  
498 control for both blots. Asterisks indicate non-specific bands.
- 499 (C) Genomic snapshots showing gene expression (cnRNA-seq) before (UNT) and after  
500 tamoxifen (OHT) treatment of *Kdm2a/b-CXXC<sup>fl/fl</sup>* mESCs, for representative genes  
501 that moderately (*Fbxl20*, left) or more dramatically increased in expression (*Fosl2*,  
502 right). BioCAP and KDM2A and KDM2B ChIP-seq signal are shown for reference  
503 (Farcas et al. 2012; Long et al. 2013b; Blackledge et al. 2014)
- 504 (D) An MA-plot showing log<sub>2</sub> fold change in gene expression (cnRNA-seq) in *Kdm2a/b-*  
505 *CXXC<sup>fl/fl</sup>* mESCs following tamoxifen treatment. The number of genes with significantly  
506 increased or decreased expression (p-adj < 0.05 and > 1.4-fold) are shown in red and  
507 density of gene expression changes is shown on the right.
- 508 (E) A density plot showing the distribution of the log<sub>2</sub> fold change in gene expression  
509 following tamoxifen treatment of *Kdm2a/b-CXXC<sup>fl/fl</sup>* mESCs, for all genes.
- 510 (F) A bar graph showing the proportion of genes that have a CGI promoter, for all genes  
511 and genes that significantly increased or decreased in expression following tamoxifen  
512 treatment of *Kdm2a/b-CXXC<sup>fl/fl</sup>* mESCs.

513

514 **Figure 4 – KDM2-mediated repression is not limited to polycomb target genes.**

- 515 (A) Metaplots showing enrichment of BioCAP signal and KDM2A, KDM2B, RING1B and  
516 SUZ12 ChIP-seq signal at the TSS of all CGI-associated genes (n=14106, green) and  
517 of the subset of these genes that significantly increased in expression following  
518 tamoxifen treatment of *Kdm2a/b-CXXC<sup>fl/fl</sup>* mESCs (n=3879, red) (Farcas et al. 2012;  
519 Long et al. 2013b; Blackledge et al. 2014).
- 520 (B) Left: an MA-plot showing log<sub>2</sub> fold change in gene expression (cnRNA-seq) in *Pcgf1<sup>fl/fl</sup>*  
521 mESCs following tamoxifen treatment to induce PCGF1 knockout (Fursova 2019). The  
522 number of genes with significantly increased or decreased expression (p-adj < 0.05  
523 and > 1.4-fold) is shown in red and density of gene expression changes is shown on  
524 the right. Right: as (B) but for *Kdm2a/b-CXXC<sup>fl/fl</sup>* mESCs, shown for comparison.
- 525 (C) A bar graph comparing the distribution of genes into three classes – non-CGI,  
526 polycomb (PRC) occupied and non-PRC occupied – for all genes and for genes that  
527 that significantly increased in expression following tamoxifen treatment of *Pcgf1<sup>fl/fl</sup>* or  
528 *Kdm2a/b-CXXC<sup>fl/fl</sup>* mESCs. Non-CGI genes are genes that lack a CGI at their  
529 promoter. Non-PRC-occupied genes have a CGI promoter that is not bound by

- 530 polycomb complexes, while PRC-occupied genes have a CGI promoter that is bound  
531 by polycomb complexes.
- 532 (D) A Venn diagram showing the overlap between genes that significantly increased in  
533 expression following tamoxifen treatment of *Pcgf1<sup>fl/fl</sup>* and *Kdm2a/b-CXXC<sup>fl/fl</sup>* mESCs.
- 534 (E) A box plot showing the starting expression level (log<sub>2</sub> UNT RPKM) for genes grouped  
535 into deciles based on their log<sub>2</sub> fold change in expression following tamoxifen  
536 treatment of *Kdm2a/b-CXXC<sup>fl/fl</sup>* mESCs.
- 537 (F) Gene ontology analysis of genes that significantly increased in expression following  
538 tamoxifen treatment of *Kdm2a/b-CXXC<sup>fl/fl</sup>* mESCs.
- 539 (G) As (H), but for the subset of significantly increasing genes that were not classified as  
540 polycomb target genes.

541

542 **Figure 5 – KDM2B plays the predominant role in gene repression.**

- 543 (A) A schematic of the *Kdm2a-CXXC<sup>fl/fl</sup>* and *Kdm2b-CXXC<sup>fl/fl</sup>* systems in which addition of  
544 tamoxifen (OHT) leads to the generation of KDM2A or KDM2B proteins that lack the  
545 ZF-CxxC domain, respectively, and therefore are unable to bind to chromatin.
- 546 (B) MA-plots showing log<sub>2</sub> fold change in gene expression (cnRNA-seq) in *Kdm2a-*  
547 *CXXC<sup>fl/fl</sup>* (left) or *Kdm2b-CXXC<sup>fl/fl</sup>* mESCs (right) following tamoxifen treatment. The  
548 number of genes with significantly increased or decreased expression (p-adj < 0.05  
549 and > 1.4-fold) are shown in red and density of gene expression changes is shown on  
550 the right.
- 551 (C) A density plot showing the distribution of the log<sub>2</sub> fold change in gene expression  
552 following tamoxifen treatment of *Kdm2a-CXXC<sup>fl/fl</sup>*, *Kdm2b-CXXC<sup>fl/fl</sup>* or *Kdm2a/b-*  
553 *CXXC<sup>fl/fl</sup>* mESCs, for all genes.
- 554 (D) A bar graph illustrating the distribution of genes between three gene classes (Non-  
555 CGI, Non-PRC, PRC) described in Figure 4C, for all genes and for genes that  
556 significantly increased or decreased in expression following tamoxifen treatment of  
557 *Kdm2b-CXXC<sup>fl/fl</sup>* mESCs.
- 558 (E) Gene ontology analysis of genes that significantly increased in expression following  
559 tamoxifen treatment of *Kdm2b-CXXC<sup>fl/fl</sup>* mESCs.
- 560 (F) As (E), but for the subset of significantly increasing genes that were not classified as  
561 polycomb target genes.
- 562 (G) A scatter plot comparing the log<sub>2</sub> fold change in gene expression (cnRNA-seq)  
563 following tamoxifen treatment of *Kdm2b-CXXC<sup>fl/fl</sup>* and *Kdm2a/b-CXXC<sup>fl/fl</sup>* mESCs. The  
564 solid line shows the linear regression, and the coefficient of determination (R<sup>2</sup>) and  
565 Spearman correlation coefficient (Cor) are annotated.

566 (H) A scatter plot of the log<sub>2</sub> fold change in gene expression (cnRNA-seq) following  
567 tamoxifen treatment of *Kdm2a/b-CXXC<sup>fl/fl</sup>* mESCs for genes that significantly increased  
568 in expression, plotted against the ratio of the log<sub>2</sub> fold change in gene expression  
569 following tamoxifen treatment of *Kdm2b-CXXC<sup>fl/fl</sup>* versus *Kdm2a/b-CXXC<sup>fl/fl</sup>* mESCs. A  
570 1.5-fold threshold (red dotted lines) was used to define genes which were differentially  
571 regulated between the two datasets, and the number of genes with more than 1.5-fold  
572 increased or decreased expression is shown in red. The solid line shows the linear  
573 regression, and the coefficient of determination ( $R^2$ ) and Spearman correlation  
574 coefficient (Cor) are annotated.

575

576 **Figure 6 – KDM2 proteins regulate RNAPII occupancy but not chromatin accessibility**  
577 **at CGI-associated gene promoters.**

578 (A) An MA-plot showing log<sub>2</sub> fold change in the accessibility (cATAC-seq) of CGI-  
579 associated gene promoters in *Kdm2a/b-CXXC<sup>fl/fl</sup>* mESCs following tamoxifen  
580 treatment. No promoters significantly changed in accessibility ( $p\text{-adj} < 0.05$  and  $> 1.4\text{-}$   
581 fold).

582 (B) A heatmap of the fold change in RNAPII ChIP-seq signal following tamoxifen treatment  
583 of *Kdm2a/b-CXXC<sup>fl/fl</sup>* mESCs, for CGI-associated ( $n=14106$ ) and non-CGI-associated  
584 ( $n=6527$ ) gene promoters.

585 (C) A metaplot showing RNAPII enrichment at CGI-associated genes before (UNT) and  
586 after tamoxifen treatment (OHT) *Kdm2a/b-CXXC<sup>fl/fl</sup>* mESCs.

587 (D) Genomic snapshots showing RNAPII occupancy before (UNT) and after tamoxifen  
588 treatment (OHT) of *Kdm2a/b-CXXC<sup>fl/fl</sup>* mESCs, for (above) a representative gene that  
589 retains RNAPII at the promoter and increases in RNAPII occupancy throughout the  
590 gene body, and (below) a representative gene that decreases in RNAPII at both  
591 promoter and gene body regions. BioCAP and KDM2A and KDM2B ChIP-seq signal  
592 are shown for reference (Farcas et al. 2012; Long et al. 2013b; Blackledge et al. 2014).

593 (E) Empirical cumulative density function (ECDF) plots of RNAPII pausing index for CGI-  
594 associated (left) or non-CGI-associated (right) genes, before (UNT) and after  
595 tamoxifen treatment (OHT) of *Kdm2a/b-CXXC<sup>fl/fl</sup>* mESCs.

596 (F) Metaplots showing Ser5P-RNAPII (upper panel) or Ser2P-RNAPII (lower panel)  
597 enrichment at CGI-associated genes before (UNT) and after tamoxifen treatment  
598 (OHT) of *Kdm2a/b-CXXC<sup>fl/fl</sup>* mESCs.

599 (G) A boxplot showing the fold change in Ser5P-RNAPII at gene promoters (left) or Ser2P-  
600 RNAPII at gene bodies (right) following tamoxifen treatment of *Kdm2a/b-CXXC<sup>fl/fl</sup>*  
601 mESCs, normalised to RNAPII-NTD signal. The fold changes for CGI-associated and  
602 non-CGI-associated genes are shown.

603

604 **Figure S1 – Related to Figure 1.**

- 605 (A) A schematic representation of the *Kdm2a/b-JmjC<sup>fl/fl</sup>* mESC line, in which loxP sites  
606 were inserted into the *Kdm2a* and *Kdm2b* genes flanking exons that encode the JmjC  
607 domain.
- 608 (B) ChIP-qPCR analysis showing KDM2A (upper panel) and KDM2B (lower panel)  
609 enrichment relative to input in *Kdm2a/b-JmjC<sup>fl/fl</sup>* mESCs before (UNT) and after  
610 tamoxifen treatment (OHT). Error bars show standard error of the mean of three  
611 biological replicates.
- 612 (C) Quantitation of western blots of histone extract from *Kdm2a/b-JmjC<sup>fl/fl</sup>* mESCs, before  
613 (UNT) and after 96 hours of tamoxifen treatment (OHT). Signal is normalised to histone  
614 H4 and is represented relative to average UNT signal. Error bars show standard  
615 deviation of three biological replicates. Significance was tested using a Student's T-  
616 test (non-significant (ns) if  $p > 0.05$ ).
- 617 (D) Representative western blots. Histone H4 is shown as a loading control.
- 618 (E) Boxplots showing CpG density (left) and size (right) of intragenic and promoter-  
619 associated CGIs.
- 620 (F) A metaplot of cnRNA-seq signal in *Kdm2a/b-JmjC<sup>fl/fl</sup>* mESCs, for CGI-associated  
621 genes separated into quartiles according to their expression level and for non-CGI-  
622 associated genes. Genes were scaled to the same length and aligned at their TSS and  
623 TES.

624

625 **Figure S3 – Related to Figure 3.**

- 626 (A) A schematic representation of the *Kdm2a/b-CxxC<sup>fl/fl</sup>* mESC line, in which loxP sites  
627 were inserted into the *Kdm2a* and *Kdm2b* genes flanking exons that encode the ZF-  
628 CxxC domain. sgRNA.1 and sgRNA.2 indicate the position of CRISPR-mediated loxP  
629 insertion.
- 630 (B) ChIP-qPCR analysis showing KDM2A (left panel) and KDM2B (right panel) enrichment  
631 relative to input in *Kdm2a/b-CXXC<sup>fl/fl</sup>* mESCs before (UNT) and after tamoxifen  
632 treatment (OHT). Error bars show standard error of the mean of four biological  
633 replicates.
- 634 (C) Digital droplet PCR analysis, showing the fold change in template cDNA concentration  
635 following tamoxifen treatment (OHT) of *Kdm2a/b-CXXC<sup>fl/fl</sup>* mESCs (blue). Error bars  
636 show standard deviation of three biological replicates. The fold change calculated by  
637 cnRNA-seq is shown for comparison (green), and the significance of this change is  
638 annotated below the graph. The dashed lines represent no change in expression  
639 (black) and the 1.4 fold change threshold used for cnRNA-seq analysis (red).



640 (D) An MA-plot showing log<sub>2</sub> fold change in gene expression in *Kdm2a/b-CXXC<sup>fl/fl</sup>* mESCs  
641 following tamoxifen treatment (OHT), normalising nRNA-seq data to total library size.  
642 The number of genes with significantly increased or decreased expression (p-adj <  
643 0.05 and > 1.4-fold) is shown in red and density of gene expression changes is shown  
644 on the right.

645

646 **Figure S4 – Related to Figure 4.**

647 (A) A scatter plot comparing the log<sub>2</sub> fold change in gene expression (cnRNA-seq)  
648 following tamoxifen treatment of *Kdm2a/b-CXXC<sup>fl/fl</sup>* and *Pcgf1<sup>fl/fl</sup>* mESCs. The solid line  
649 shows the linear regression, and the coefficient of determination (R<sup>2</sup>) and Spearman  
650 correlation coefficient (Cor) are annotated.

651

652 **Figure S5 – Related to Figure 5.**

653 (A) Western blot analysis for KDM2A and KDM2B in *Kdm2a-CXXC<sup>fl/fl</sup>* mESCs before  
654 (UNT) and after 96 hours of tamoxifen treatment (OHT). BRG1 is shown as a loading  
655 control for both blots. Asterisks indicate non-specific bands.

656 (B) As (A) but for *Kdm2b-CXXC<sup>fl/fl</sup>* mESCs.

657

658 **Figure S6 – Related to Figure 6.**

659 (A) MA-plots showing log<sub>2</sub> fold change in the accessibility (cATAC-seq) of CGI-associated  
660 gene promoters in *Kdm2a-CXXC<sup>fl/fl</sup>* (left) or *Kdm2a-CXXC<sup>fl/fl</sup>* (right) mESCs following  
661 tamoxifen treatment. No promoters significantly changed in accessibility (p-adj < 0.05  
662 and > 1.4-fold).

663 (B) An illustration of the pausing index, the ratio of the average read density of RNAPII-  
664 NTD at the promoter and the average read density of RNAPII in the gene body.

665 (C) Scatter plots comparing the log<sub>2</sub> fold change in gene expression (cnRNA-seq) with the  
666 log<sub>2</sub> fold change in RNAPII occupancy (ChIP-seq) following tamoxifen treatment of  
667 *Kdm2a/b-CXXC<sup>fl/fl</sup>* mESCs, at CGI-associated gene promoters (left) or gene bodies  
668 (right). The solid line shows the linear regression, and the coefficient of determination  
669 (R<sup>2</sup>) and Spearman correlation coefficient (Cor) are annotated.

670 (D) Boxplots showing the fold change in RNAPII occupancy at CGI-associated gene  
671 promoters (left) or gene bodies (right) following tamoxifen treatment of *Kdm2a/b-*  
672 *CXXC<sup>fl/fl</sup>* mESCs, for all CGI genes or for genes that significantly increased in  
673 expression separated into quartiles according to their log<sub>2</sub> fold change in expression  
674 (Q1 < Q2 < Q3 < Q4).

675 (E) A metaplot showing RNAPII enrichment before (UNT) and after tamoxifen treatment  
676 (OHT) of *Kdm2a/b-CXXC<sup>fl/fl</sup>* mESCs, for the top quartile of significantly upregulated  
677 genes (Q4 – as in (D)).

678 (F) Heatmap analyses of the fold change in RNAPII, Ser5-RNAPII or Ser2P-RNAPII ChIP-  
679 seq signal following tamoxifen treatment of *Kdm2a/b-CXXC<sup>fl/fl</sup>* mESCs, for CGI-  
680 associated (n=14106) and non-CGI-associated (n=6527) gene promoters.

681

## 682 MATERIALS AND METHODS

### 683 Cell culture

684 Mouse embryonic stem cells (mESCs) were cultured on gelatine-coated dishes at 37°C and  
685 5% CO<sub>2</sub>, in DMEM (Life Technologies) supplemented with 15% fetal bovine serum (Labtech),  
686 2mM L-glutamine (Life Technologies), 0.5 mM beta-mercaptoethanol (Life Technologies), 1x  
687 non-essential amino acids (Life Technologies), 1x penicillin-streptomycin (Life Technologies),  
688 and 10 ng/ml leukemia-inhibitory factor. Conditional mESC lines were treated with 800 nM 4-  
689 hydroxytamoxifen (Sigma) for 96 hours to induce KDM2-LFs knockout (*Kdm2a/b-JmjC<sup>fl/fl</sup>*) or  
690 ZF-CxxC domain deletion (*Kdm2a/b-CXXC<sup>fl/fl</sup>*, *Kdm2a-CXXC<sup>fl/fl</sup>*, *Kdm2b-CXXC<sup>fl/fl</sup>*).

691 Human HEK293T cells used for RNAPII cChIP-seq were grown at 37°C and 5% CO<sub>2</sub> in DMEM  
692 supplemented with 10% fetal bovine serum, 2 mM L-glutamine, 0.5 mM beta-mercaptoethanol  
693 and 1x penicillin-streptomycin. *D. melanogaster* S2 (SG4) cells used for cnRNA-seq were  
694 grown adhesively at 25°C in Schneider's Drosophila Medium (Life Technologies),  
695 supplemented with 1x penicillin-streptomycin and 10% heat-inactivated fetal bovine serum.

696

### 697 Generation of the *Kdm2a/b-JmjC<sup>fl/fl</sup>* mESC line

698 To generate the *Kdm2a/b-JmjC<sup>fl/fl</sup>* mESC line, a loxP site was inserted upstream of the critical  
699 JmjC domain-encoding exon(s) in the *Kdm2a* and *Kdm2b* genes (exon 8 for *Kdm2a*, and  
700 exons 7-8 for *Kdm2b*), and FRT flanked PGK-neo and a second loxP site was inserted  
701 downstream of the critical exon(s). Targeting vectors were generated from bacterial artificial  
702 chromosomes containing the target mouse genomic regions using the Double Red  
703 recombination method, as previously described (Suzuki and Nakayama 2011). Linearized  
704 targeting vectors were introduced into M1 mESCs by electroporation (GenePulser, Bio-Rad).  
705 mESC colonies were isolated and expanded, and the genomic DNA of each clone was  
706 purified. Homozygous loxP targeting was verified by sequencing of the genomic region  
707 surrounding the loxP sites. Targeted ES cells were injected into mouse blastocysts to generate

708 chimeric mice. The *Kdm2a/b-JmjC<sup>fl/fl</sup>* line was generated by removal of the PGK-neo marker  
709 gene by mating the targeted mice with mice expressing FLP recombinase. These *Kdm2a/b-*  
710 *JmjC<sup>fl/fl</sup>* mice were further mated with mice harboring the ROSA26-CreErt2 locus to generate  
711 *Kdm2a/b-JmjC<sup>fl/fl</sup>:ROSA26-CreErt2<sup>+/-</sup>* mice, from which the *Kdm2a/b-JmjC<sup>fl/fl</sup>* mESCs used in  
712 this study were derived.

713

## 714 **Generation of *Kdm2a-CXXC<sup>fl/fl</sup>* and *Kdm2a/b-CXXC<sup>fl/fl</sup>* mESC lines**

715 Conditional *Kdm2a-CXXC<sup>fl/fl</sup>* and *Kdm2a/b-CXXC<sup>fl/fl</sup>* mESC lines were generated by using  
716 CRISPR-mediated genome editing to insert parallel loxP sites flanking exon 14 of the *Kdm2a*  
717 gene in *Rosa26::CreERT2* or *Kdm2b-CXXC<sup>fl/fl</sup>* mESCs, respectively (Blackledge et al. 2014).  
718 Targeting constructs encoding the loxP sequence flanked by 150 bp homology arms and  
719 carrying a mutated PAM sequence to prevent retargeting by the Cas9 enzyme were purchased  
720 from GeneArt (ThermoFisher). The pSpCas9(BB)-2A-Puro(PX459)-V2.0 vector was obtained  
721 from Addgene (#62988). sgRNAs were designed using the CRISPOR online tool  
722 (<http://crispor.tefor.net/crispor.py>) and were cloned into the vector as previously described  
723 (Ran et al. 2013). First, the upstream loxP site was targeted. *Rosa26::CreERT2* or *Kdm2b-*  
724 *CXXC<sup>fl/fl</sup>* mESCs were transiently co-transfected with 1 µg of Cas9-sgRNA plasmid and 3.5 µg  
725 of targeting construct using Lipofectamine 3000 (ThermoFisher). The day after transfection,  
726 cells were passaged at a range of densities and subjected to puromycin selection (1 µg/ml)  
727 for 48 hours. Individual clones were isolated and PCR-screened. A correctly targeted  
728 homozygous clone was then used to target the downstream loxP site using the same  
729 transfection protocol and screening strategy. Correct loxP targeting was verified by  
730 sequencing of the genomic region surround the loxP sites, and clones were analysed by both  
731 RT-qPCR and western blot to confirm loss of the ZF-CxxC domain in response to tamoxifen  
732 treatment.

733

## 734 **Protein extracts and immunoblotting**

735 For nuclear extraction, mESCs were washed with PBS then resuspended in 10 volumes of  
736 Buffer A (10mM Hepes pH 7.9, 1.5mM MgCl<sub>2</sub>, 10mM KCl, 0.5mM DTT, 0.5mM PMSF, and 1x  
737 PIC (Roche)) and incubated on ice for 10 min. Cells were recovered by centrifugation at 1500  
738 g for 5 min, resuspended in 3 volumes of Buffer A supplemented with 0.1% NP-40 and  
739 incubated on ice for 10 min. The released nuclei were recovered by centrifugation at 1500 g  
740 for 5 min and resuspended in 1 pellet volume of Buffer B (5mM Hepes pH 7.9, 26% glycerol,  
741 400mM NaCl, 1.5mM MgCl<sub>2</sub>, 0.2mM EDTA, 0.5mM DTT and 1x PIC). After 1 hour of rotation

742 at 4°C, the suspension was pelleted at 16,000 g for 20 min and the supernatant taken as  
743 nuclear extract.

744 For histone extraction, mESCs were washed with RSB (10mM Tris HCl pH 7.4, 10mM NaCl,  
745 3mM MgCl<sub>2</sub> and 20mM NEM), then resuspended in RSB buffer supplemented with 0.5% NP-  
746 40 and incubated on ice for 10 min to allow cell lysis. Following centrifugation at 500 g for 5  
747 min, the nuclear pellet was incubated in 2.5mM MgCl<sub>2</sub>, 0.4M HCl and 20mM NEM on ice for  
748 20 min. After centrifugation at 16,000 g for 20 min, histones were precipitated from the  
749 supernatant on ice with 25% TCA for 30 min. Histones were recovered by centrifugation at  
750 16,000 g for 15 min, and the pellet was washed twice in acetone. The histone pellet was  
751 resuspended in 1x SDS loading buffer and boiled at 95°C for 5 min. Any insoluble precipitate  
752 was pelleted by centrifugation at 16,000 g for 15 min and the soluble fraction retained as  
753 histone extract. Histone concentrations were compared by Coomassie Blue staining following  
754 SDS-PAGE. Semi-quantitative western blot analysis of histone extracts was performed using  
755 LiCOR IRDye® secondary antibodies and the LiCOR Odyssey Fc system. To measure  
756 changes in H3K36 methylation, the signal relative to H4 histone was determined.

757

## 758 **Antibodies**

759 The following antibodies were used in this study: anti-KDM2A (Blackledge et al. 2010), anti-  
760 KDM2B (Farcas et al. 2012), anti-BRG1 (EPNCIR111A, Abcam), anti-H3, anti-H3K36me1,  
761 anti-H3K36me2 (Blackledge et al. 2010), anti-H3K36me3, anti-H4 (L64C1, Cell Signalling),  
762 anti-Rbp1-NTD (D8L4Y, Cell Signalling), anti-Rbp1-CTD-Ser5P (D9N5I, Cell Signalling), anti-  
763 Rbp1-CTD-Ser2P (E1Z3G, Cell Signalling). Anti-H3 and anti-H3K36me antibodies were  
764 prepared in-house by rabbit immunisation with synthetic peptides (PTU/BS Scottish National  
765 Blood Transfusion Service), and antibodies were purified on peptide affinity columns.

766

## 767 **Preparation of chromatin**

768 For KDM2A/B ChIP, 5x10<sup>7</sup> mESCs were resuspended in PBS and crosslinked in 2 mM  
769 disuccinimidyl glutarate (Thermo Scientific) for 45 min at 25°C with gentle rotation, then in 1%  
770 formaldehyde for 12.5 min (methanol-free, Life Technologies). Reactions were quenched by  
771 addition of 125 mM glycine, and crosslinked cells were resuspended in lysis buffer (50mM  
772 HEPES-KOH pH 7.9, 140mM NaCl, 1mM EDTA, 10% glycerol, 0.5% NP40, 0.25% TritonX-  
773 100 and 1x PIC) and rotated for 10 min at 4°C. The released nuclei were washed (10 mM Tris-  
774 HCl pH 8.0, 200mM NaCl, 1mM EDTA, 0.5mM EGTA and 1x PIC) for 5 min at 4°C, and the

775 nuclear pellet resuspended in 1 ml sonication buffer (10mM Tris HCl pH 8.0, 100mM NaCl,  
776 1mM EDTA, 0.5mM EGTA, 0.1% sodium deoxycholate, 0.5% N-lauroylsarcosine and 1x PIC).

777 For histone ChIP,  $1 \times 10^7$  mESCs were crosslinked for 10 min in 1% formaldehyde. Reactions  
778 were quenched by addition of 125 mM glycine. The released nuclei washed twice in PBS, then  
779 resuspended in lysis buffer (1% SDS, 10mM EDTA, 50mM Tris HCl pH 8.1 and 1x PIC) and  
780 incubated on ice for 30 min.

781 For RNAPII ChIP,  $5 \times 10^7$  mESCs were resuspended in PBS and mixed with  $4 \times 10^6$  HEK293T  
782 cells. Cells were crosslinked for 10 min in 1% formaldehyde. Reactions were quenched by  
783 addition of 150 mM glycine, and the crosslinked cells resuspended in FA-lysis buffer for 10  
784 min (50mM HEPES pH 7.9, 150mM NaCl, 2mM EDTA, 0.5mM EGTA, 0.5% NP40, 0.1%  
785 sodium deoxycholate, 0.1% SDS, 10mM NaF, 1mM AEBSF, 1x PIC).

786 Chromatin was sonicated using a BioRuptor Pico sonicator (Diagenode), shearing genomic  
787 DNA to approximately 0.5 kb. Following sonication, TritonX-100 was added to chromatin used  
788 for KDM2A/B ChIP to a final concentration of 1%.

789

## 790 **Chromatin immunoprecipitation and sequencing**

791 Sonicated chromatin was diluted 10-fold in ChIP dilution buffer (1% Triton-X100, 1 mM EDTA,  
792 20mM TrisHCl pH 8, 150mM NaCl and 1x PIC) for KDM2A/B or histone ChIP, or in FA-lysis  
793 buffer for RNAPII ChIP. Chromatin was pre-cleared for 1 hour with either protein A magnetic  
794 Dynabeads (Invitrogen, for KDM2A/B ChIP) or protein A agarose beads (Repligen, for histone  
795 or RNAPII ChIP) blocked with 1 mg/ml BSA and 1 mg/ml yeast tRNA. For each ChIP reaction,  
796 150  $\mu$ g chromatin (KDM2A/B), 300  $\mu$ g chromatin (RNAPII) or chromatin corresponding to  
797  $1 \times 10^5$  cells (histone ChIP) was incubated overnight with the appropriate antibody: anti-KDM2A  
798 (2.4  $\mu$ l), anti-KDM2B (2  $\mu$ l), anti-H3 (15  $\mu$ l) anti-H3K36me2 (15  $\mu$ l), anti-Rbp1-NTD (15  $\mu$ l),  
799 anti-Rbp1-CTD-Ser5P (12.5  $\mu$ l), anti-Rbp1-CTD-Ser2P (12.5  $\mu$ l).

800 Antibody-bound chromatin was isolated using blocked protein A agarose (histone/ RNAPII  
801 ChIP) or magnetic beads (KDM2A/B ChIP) for 2 hours at 4°C. For histone or KDM2A/B ChIP,  
802 washes were performed with low salt buffer (0.1% SDS, 1% TritonX-100, 2 mM EDTA, 20 mM  
803 Tris-HCl pH 8, 150 mM NaCl), high salt buffer (0.1% SDS, 1% TritonX-100, 2 mM EDTA, 20  
804 mM Tris-HCl pH 8, 500 mM NaCl), LiCl buffer (250mM LiCl, 1% NP40, 1% sodium  
805 deoxycholate, 1 mM EDTA, 10 mM Tris-HCl pH 8) and two washes with TE buffer (10 mM  
806 Tris-HCl pH 8, 1 mM EDTA). For RNAPII ChIP, washes were performed with FA-Lysis buffer,  
807 FA-Lysis buffer containing 500mM NaCl, DOC buffer (250mM LiCl, 0.5% NP40, 0.5% sodium  
808 deoxycholate, 2 mM EDTA, 10mM Tris-HCl pH 8) and two washes with TE buffer. ChIP DNA



809 was eluted in elution buffer (1% SDS, 100mM NaHCO<sub>3</sub>) and crosslinks reversed overnight at  
810 65°C with 200 mM NaCl and 2 µl RNase A (Sigma). A matched input sample (corresponding  
811 to 10% of original ChIP reaction) was treated identically. The following day, samples were  
812 treated with 20 µg/ml Proteinase K (Sigma) for 2 hours at 45°C and purified using the ChIP  
813 DNA Clean and Concentrator Kit (Zymo Research).

814 ChIP-seq libraries for both ChIP and input samples were prepared using the NEBNext Ultra  
815 DNA Library Prep Kit for Illumina (NEB), following the manufacturer's guidelines and using  
816 NEBNext Multiplex Oligos. The average size and concentration of libraries were determined  
817 using the 2100 Bioanalyzer High Sensitivity DNA Kit (Agilent) and qPCR with SensiMix SYBR  
818 (Bioline) and KAPA Illumina DNA standards (Roche). Libraries were sequenced using the  
819 Illumina NextSeq 500 platform in biological triplicate or quadruplicate with 40 bp paired-end  
820 reads.

821

## 822 **Calibrated nuclear RNA-sequencing and ATAC-sequencing (cnRNA-seq and** 823 **cATAC-seq)**

824 To isolate nuclei for cnRNA-seq and cATAC-seq, 10<sup>7</sup> mESCs were mixed with 2.5x10<sup>6</sup>  
825 Drosophila SG4 cells in PBS. Cells were lysed in 1 ml HS lysis buffer (0.05% NP40, 50mM  
826 KCl, 10 mM MgSO<sub>4</sub>·7H<sub>2</sub>O, 5mM HEPES, 1mM PMSF, 3mM DTT, 1x PIC). Nuclei were  
827 recovered by centrifugation at 1000 g for 5min and washed three times in 1 ml resuspension  
828 buffer (10mM NaCl, 10mM Tris pH 7.4, 3mM MgCl<sub>2</sub>). Nuclear integrity was assessed using  
829 0.4% trypan blue staining (ThermoFisher).

830 Nuclear RNA was prepared from 4x10<sup>6</sup> nuclei using TRIzol reagent according to the  
831 manufacturer's protocol (Invitrogen), then treated with the TURBO DNA-free kit  
832 (ThermoFisher). nRNA quality was assessed using the 2100 Bioanalyzer RNA 6000 Pico kit  
833 (Agilent), then nRNA was depleted of rRNA using the NEBNext rRNA depletion kit and the  
834 depletion efficiency evaluated using the Bioanalyzer RNA 6000 Pico kit. RNA-seq libraries  
835 were prepared using the NEBNext Ultra Directional RNA-seq kit, and library size and  
836 concentration was determined as described for ChIP libraries. Libraries were sequenced using  
837 the Illumina NextSeq 500 platform in biological triplicate or quadruplicate using 80 bp paired-  
838 end reads.

839 Chromatin accessibility was assayed using an adaptation of the assay for transposase  
840 accessible-chromatin (ATAC)-seq (Buenrostro et al. 2013) as previously described (King and  
841 Klose 2017), using 5x10<sup>5</sup> nuclei from the same preparation used for the purification of nuclear  
842 RNA. Genomic DNA was also purified from an aliquot of the same preparation of nuclei by

843 phenol-chloroform extraction and tagmented with Tn5, to control for sequence bias of the Tn5  
844 transposase and to determine the exact mouse/fly mixing ratio for each individual sample.

845 ATAC-seq and input gDNA libraries were prepared by PCR amplification using custom-made  
846 Illumina barcodes (Buenrostro et al. 2013) and the NEBNext High-Fidelity 2X PCR Master  
847 Mix. Libraries were purified with two rounds of Agencourt AMPure XP bead cleanup  
848 (Agencourt, 1.5X bead:sample ratio). Library size and concentration were determined as  
849 described for ChIP libraries. Libraries were sequenced using the Illumina NextSeq 500  
850 platform in biological triplicate or quadruplicate using 80 bp paired-end reads.

851

## 852 **Digital droplet PCR**

853 For digital droplet PCR (ddPCR), total RNA was prepared from  $10^6$  mESCs using the RNeasy  
854 mini plus kit including gDNA eliminator columns (QIAGEN). RPT low retention tips (Starlab)  
855 were used throughout the ddPCR protocol to increase pipetting accuracy. Purified RNA was  
856 eluted in 30  $\mu$ l elution buffer, 7  $\mu$ l was diluted with 8  $\mu$ l water, and 4  $\mu$ l of this dilution was  
857 reverse transcribed using the imProm-II system with random hexamer primers and RNasin  
858 ribonuclease inhibitor (Promega). The generated cDNA was diluted with 300  $\mu$ l nuclease-free  
859 water. ddPCR primers were designed using Primer 3 Plus (Untergasser et al. 2012) with  
860 BioRad recommended settings: 3.8mM divalent cations, 0.8mM dNTPs, 80-120 bp product,  
861 60-61°C melting temperature. Their efficiency was tested using a serial dilution curve of cDNA  
862 by standard SYBR qPCR. ddPCR reactions were prepared in 96-well PCR plates, and  
863 contained 12.5  $\mu$ l 2x QX200 ddPCR EvaGreen Supermix (BioRad), 0.32  $\mu$ l each of forward  
864 and reverse primers (10  $\mu$ M), 7  $\mu$ l diluted cDNA and 4.86  $\mu$ l nuclease-free water. This 25  $\mu$ l  
865 reaction was mixed by pipetting, then 22  $\mu$ l was transferred to a semi-skirted 96-well PCR  
866 plate (Eppendorf) and used for droplet generation with an AutoDG droplet generator (BioRad).  
867 Droplets were collected in a semi-skirted PCR plate, which was then sealed using a PX1 PCR  
868 plate sealer (BioRad). PCR was performed using a C1000 Touch thermal cycler (BioRad) with  
869 a 2°C/s ramp rate: 5 min at 95°C followed by 40 cycles of denaturation at 95°C for 30 s and  
870 annealing/extension at 60°C for 60 s, then signal stabilisation at 4°C for 5 min followed by  
871 90°C for 5 min. Droplets were sorted into PCR-positive and PCR-negative fractions according  
872 to their fluorescence using the QX200 droplet reader (BioRad). QuantaLife software (BioRad)  
873 was used to calculate the absolute concentration of template cDNA in the ddPCR reaction.

874

## 875 **Data processing and normalisation of massively-parallel sequencing**

876 For cATAC-seq and RNAPII cChIP-seq (including sequencing of input gDNA), reads were  
877 aligned to concatenated mouse and spike-in genomes (mm10+dm6 or mm10+hg19) using  
878 Bowtie 2 with the '--no-mixed' and '--no-discordant' options (Langmead and Salzberg 2012).  
879 For histone ChIP-seq, reads were aligned to the mouse mm10 genome as above. Reads that  
880 were mapped more than once were discarded, and PCR duplicates were removed using  
881 SAMTools (Li et al. 2009b). For cATAC-seq, reads that mapped to a custom 'blacklist' of  
882 genomic regions with artificially high counts, including mitochondrial DNA sequences, were  
883 also discarded.

884 For cnRNA-seq, reads were first aligned using Bowtie 2 (with '--very-fast', '--no-mixed' and '--  
885 no-discordant' options) to the concatenated mm10 and dm6 rRNA genomic sequence  
886 (GenBank: BK000964.3 and M21017.1) to filter out reads mapping to rRNA. All unmapped  
887 reads were aligned to the concatenated mm10+dm6 genome using STAR (Dobin et al. 2013).  
888 To improve mapping of intronic sequences, reads that failed to map using STAR were aligned  
889 using Bowtie 2, with '--sensitive-local', '--no-mixed' and '--no-discordant' options. PCR  
890 duplicates were removed using SAMtools (Li et al. 2009b).

891 To internally calibrate cnRNA-seq, cATAC-seq and cChIP-seq experiments we spiked a fixed  
892 number of control cells into each sample (*Drosophila* SG4 cells for cnRNA-seq and cATAC-  
893 seq, human HEK293T cells for RNAPII cChIP-seq). This spike-in genome was then used to  
894 quantitatively compare the gene expression, chromatin accessibility or RNAPII profiles  
895 between experimental conditions. For visualisation of cATAC-seq and cChIP-seq data, mm10  
896 reads were randomly subsampled by a factor that reflects the total number of spike-in reads  
897 in the same sample, as previously described (Bonhoure et al. 2014; Orlando et al. 2014; Hu  
898 et al. 2015). To account for any variation in the exact spike-in cell: mESC mixing ratio between  
899 biological replicates, the subsampling factors were additionally corrected according to the ratio  
900 of dm6 (or hg19)/mm10 total read counts in the matched input sample. For visualisation of  
901 cnRNA-seq data, mm10 reads were randomly subsampled by *Drosophila* normalised size  
902 factors calculated using DESeq2 (see below). Histone ChIP-seq libraries were randomly  
903 downsampled to achieve the same total number of reads for each individual replicate using  
904 SAMtools (Li et al. 2009b).

905

## 906 **Read count quantitation and analysis**

907 To compare replicates, read coverage across regions of interest (gene bodies for cnRNA-seq  
908 and ChIP-seq, gene promoters for cATAC-seq) was analysed using deepTools  
909 multiBamSummary and plotCorrelation functions (Ramírez et al. 2016). For each condition,

910 biological replicates correlated well with each other (Pearson correlation coefficient > 0.95)  
911 and were merged for downstream applications.

912 Genome coverage tracks were generated using the pileup function from MACS2 (Zhang et al.  
913 2008) for ChIP-seq and ATAC-seq and genomeCoverageBed from BEDtools (Quinlan 2014)  
914 for cnRNA-seq and visualised using the UCSC genome browser (Kent et al. 2002). Differential  
915 bigwig tracks of H3K36me2 normalised to H3, normalised H3K36me2 signal in tamoxifen-  
916 treated versus -untreated cells, or RNAPII signal in tamoxifen-treated versus -untreated cells,  
917 were generated from merged bigwig files using the deepTools bigwigCompare function with '-  
918 -operation ratio' setting (Ramírez et al. 2016). Metaplot and heatmap analyses of read density  
919 were performed using the computeMatrix, plotProfile and plotHeatmap deepTools functions  
920 (v3.0.1). For ChIP-seq, intervals of interest were annotated with normalised read counts from  
921 merged replicates with a custom Perl script using SAMtools, or from differential bigwig files  
922 using deepTools computeMatrix with the '--outFileNameMatrix' option. Correlation analyses  
923 were performed in R using Spearman correlation and visualised with scatterplots coloured by  
924 density using 'stat\_density2d'.

925

## 926 **Differential ATAC-seq and gene expression analyses**

927 DESeq2 (Love et al. 2014) was used with a custom R script to identify significant changes in  
928 chromatin accessibility or gene expression. In order to calibrate to the spike-in genome,  
929 *Drosophila* reads were first pre-normalised according to the exact dm6/mm10 spike-in ratio  
930 derived from the matched input gDNA sample. *Drosophila* read counts were then generated  
931 for a set of unique dm6 refGene genes and used to calculate DESeq2 size factors. These size  
932 factors were supplied for DESeq2 normalisation of raw mm10 read counts for a custom non-  
933 redundant mm10 gene set of 20633 genes. P-adj < 0.05 and fold change > 1.4 thresholds  
934 were used to determine significant changes. Log2 fold changes were visualised using MA-  
935 plots generated with ggplot2.

936

## 937 **Gene annotation**

938 Non-redundant mouse genes (n = 20633) were classified into non-CGI, PRC and non-PRC  
939 categories based on the presence of a non-methylated CGI and RING1B and SUZ12 binding  
940 at their promoters. Gene Ontology analysis was performed using DAVID (Huang da et al.  
941 2009). The BP FAT setting and a FDR < 0.1 cut-off were used, and the complete non-  
942 redundant mm10 gene set was used as a background.

943

#### 944 **Accession numbers**

945 The following previously published datasets were used for analysis: H3K36me3 ChIP-seq  
946 (GSE34520) (Brookes et al. 2012), KDM2A ChIP-seq (GSE41267) (Farcas et al. 2012),  
947 KDM2B ChIP-seq (GSE55698) (Blackledge et al. 2014), BioCAP (GSE43512) (Long et al.  
948 2013b).

949

#### 950 **ACKNOWLEDGEMENTS**

951 We thank Nadezda Fursova for assistance with computational analysis, Emilia Dimitrova,  
952 Angelika Feldmann and Neil Blackledge for helpful discussions, and Amy Hughes and Neil  
953 Blackledge for critical reading of the manuscript. We are grateful to Amanda Williams at the  
954 Department of Zoology in Oxford for sequencing support on the NextSeq 500. Work in the  
955 Klose laboratory is supported by the Wellcome Trust, the Lister Institute of Preventive  
956 Medicine and the European Research Council. Takashi Kondo and Haruhiko Koseki are  
957 supported by the AMED-CREST programme from the Japan Agency for Medical Research  
958 and Development.



## 959 REFERENCES

- 960 Bannister AJ, Schneider R, Myers FA, Thorne AW, Crane-Robinson C, Kouzarides T. 2005.  
961 Spatial distribution of di- and tri-methyl lysine 36 of histone H3 at active genes. *The*  
962 *Journal of biological chemistry* **280**: 17732-17736.
- 963 Barski A, Cuddapah S, Cui K, Roh TY, Schones DE, Wang Z, Wei G, Chepelev I, Zhao K.  
964 2007. High-resolution profiling of histone methylations in the human genome. *Cell* **129**:  
965 823-837.
- 966 Bell O, Wirbelauer C, Hild M, Scharf AND, Schwaiger M, MacAlpine DM, Zilbermann F, van  
967 Leeuwen F, Bell SP, Imhof A et al. 2007. Localized H3K36 methylation states define  
968 histone H4K16 acetylation during transcriptional elongation in *Drosophila*. *The EMBO*  
969 *Journal* **26**: 4974-4984.
- 970 Blackledge NP, Farcas AM, Kondo T, King HW, McGouran JF, Hanssen LL, Ito S, Cooper S,  
971 Kondo K, Koseki Y et al. 2014. Variant PRC1 complex-dependent H2A ubiquitylation  
972 drives PRC2 recruitment and polycomb domain formation. *Cell* **157**: 1445-1459.
- 973 Blackledge NP, Klose R. 2011. CpG island chromatin: a platform for gene regulation.  
974 *Epigenetics* **6**: 147-152.
- 975 Blackledge NP, Zhou JC, Tolstorukov MY, Farcas AM, Park PJ, Klose RJ. 2010. CpG islands  
976 recruit a histone H3 lysine 36 demethylase. *Molecular cell* **38**: 179-190.
- 977 Bonhoure N, Bounova G, Bernasconi D, Praz V, Lammers F, Canella D, Willis IM, Herr W,  
978 Hernandez N, Delorenzi M et al. 2014. Quantifying ChIP-seq data: a spiking method  
979 providing an internal reference for sample-to-sample normalization. *Genome research*  
980 **24**: 1157-1168.
- 981 Borgel J, Tyl M, Schiller K, Pusztai Z, Dooley CM, Deng W, Wooding C, White RJ, Warnecke  
982 T, Leonhardt H et al. 2017. KDM2A integrates DNA and histone modification signals  
983 through a CXXC/PHD module and direct interaction with HP1. *Nucleic acids research*  
984 **45**: 1114-1129.
- 985 Boulard M, Edwards JR, Bestor TH. 2015. FBXL10 protects Polycomb-bound genes from  
986 hypermethylation. *Nature genetics* **47**: 479-485.
- 987 Boyle AP, Davis S, Shulha HP, Meltzer P, Margulies EH, Weng Z, Furey TS, Crawford GE.  
988 2008. High-resolution mapping and characterization of open chromatin across the  
989 genome. *Cell* **132**: 311-322.
- 990 Brookes E, de Santiago I, Hebenstreit D, Morris KJ, Carroll T, Xie SQ, Stock JK, Heidemann  
991 M, Eick D, Nozaki N et al. 2012. Polycomb associates genome-wide with a specific  
992 RNA polymerase II variant, and regulates metabolic genes in ESCs. *Cell stem cell* **10**:  
993 157-170.
- 994 Bueno MTD, Baldascini M, Richard S, Lowndes NF. 2018. Recruitment of lysine demethylase  
995 2A to DNA double strand breaks and its interaction with 53BP1 ensures genome  
996 stability. *Oncotarget* **9**: 15915-15930.
- 997 Buenrostro JD, Giresi PG, Zaba LC, Chang HY, Greenleaf WJ. 2013. Transposition of native  
998 chromatin for fast and sensitive epigenomic profiling of open chromatin, DNA-binding  
999 proteins and nucleosome position. *Nature methods* **10**: 1213-1218.
- 1000 Cardozo T, Pagano M. 2004. The SCF ubiquitin ligase: insights into a molecular machine.  
1001 *Nature reviews Molecular cell biology* **5**: 739-751.
- 1002 Carrozza MJ, Li B, Florens L, Sukanuma T, Swanson SK, Lee KK, Shia WJ, Anderson S,  
1003 Yates J, Washburn MP et al. 2005. Histone H3 methylation by Set2 directs  
1004 deacetylation of coding regions by Rpd3S to suppress spurious intragenic  
1005 transcription. *Cell* **123**: 581-592.
- 1006 Carvalho S, Raposo AC, Martins FB, Grosso AR, Sridhara SC, Rino J, Carmo-Fonseca M, de  
1007 Almeida SF. 2013. Histone methyltransferase SETD2 coordinates FACT recruitment  
1008 with nucleosome dynamics during transcription. *Nucleic acids research* **41**: 2881-2893.
- 1009 Cheng Z, Cheung P, Kuo AJ, Yukl ET, Wilmot CM, Gozani O, Patel DJ. 2014. A molecular  
1010 threading mechanism underlies Jumonji lysine demethylase KDM2A regulation of  
1011 methylated H3K36. *Genes & development* **28**: 1758-1771.

- 1012 Cloos PA, Christensen J, Agger K, Maiolica A, Rappsilber J, Antal T, Hansen KH, Helin K.  
1013 2006. The putative oncogene GASC1 demethylates tri- and dimethylated lysine 9 on  
1014 histone H3. *Nature* **442**: 307-311.
- 1015 Deaton AM, Bird A. 2011. CpG islands and the regulation of transcription. *Genes &*  
1016 *development* **25**: 1010-1022.
- 1017 Dobin A, Davis CA, Schlesinger F, Drenkow J, Zaleski C, Jha S, Batut P, Chaisson M,  
1018 Gingeras TR. 2013. STAR: ultrafast universal RNA-seq aligner. *Bioinformatics*  
1019 (*Oxford, England*) **29**: 15-21.
- 1020 Du J, Ma Y, Ma P, Wang S, Fan Z. 2013. Demethylation of epiregulin gene by histone  
1021 demethylase FBXL11 and BCL6 corepressor inhibits osteo/dentinogenic  
1022 differentiation. *Stem cells (Dayton, Ohio)* **31**: 126-136.
- 1023 Edmunds JW, Mahadevan LC, Clayton AL. 2008. Dynamic histone H3 methylation during  
1024 gene induction: HYPB/Setd2 mediates all H3K36 trimethylation. *Embo j* **27**: 406-420.
- 1025 Fang J, Hogan GJ, Liang G, Lieb JD, Zhang Y. 2007. The *Saccharomyces cerevisiae* histone  
1026 demethylase Jhd1 fine-tunes the distribution of H3K36me2. *Molecular and cellular*  
1027 *biology* **27**: 5055-5065.
- 1028 Farcas AM, Blackledge NP, Sudbery I, Long HK, McGouran JF, Rose NR, Lee S, Sims D,  
1029 Cerase A, Sheahan TW et al. 2012. KDM2B links the Polycomb Repressive Complex  
1030 1 (PRC1) to recognition of CpG islands. *eLife* **1**: e00205.
- 1031 Fodor BD, Kubicek S, Yonezawa M, O'Sullivan RJ, Sengupta R, Perez-Burgos L, Opravil S,  
1032 Mechtler K, Schotta G, Jenuwein T. 2006. Jmjd2b antagonizes H3K9 trimethylation at  
1033 pericentric heterochromatin in mammalian cells. *Genes & development* **20**: 1557-1562.
- 1034 Frescas D, Guardavaccaro D, Bassermann F, Koyama-Nasu R, Pagano M. 2007.  
1035 JHDM1B/FBXL10 is a nucleolar protein that represses transcription of ribosomal RNA  
1036 genes. *Nature* **450**: 309-313.
- 1037 Fursova NA. 2019. Unpublished data, Klose Lab.
- 1038 Gearhart MD, Corcoran CM, Wamstad JA, Bardwell VJ. 2006. Polycomb group and SCF  
1039 ubiquitin ligases are found in a novel BCOR complex that is recruited to BCL6 targets.  
1040 *Molecular and cellular biology* **26**: 6880-6889.
- 1041 Gregory GD, Vakoc CR, Rozovskaia T, Zheng X, Patel S, Nakamura T, Canaani E, Blobel  
1042 GA. 2007. Mammalian ASH1L is a histone methyltransferase that occupies the  
1043 transcribed region of active genes. *Molecular and cellular biology* **27**: 8466-8479.
- 1044 Han XR, Zha Z, Yuan HX, Feng X, Xia YK, Lei QY, Guan KL, Xiong Y. 2016. KDM2B/FBXL10  
1045 targets c-Fos for ubiquitylation and degradation in response to mitogenic stimulation.  
1046 *Oncogene* **35**: 4179-4190.
- 1047 He J, Kallin EM, Tsukada Y-I, Zhang Y. 2008. The H3K36 demethylase Jhdm1b/Kdm2b  
1048 regulates cell proliferation and senescence through p15(Ink4b). *Nature structural &*  
1049 *molecular biology* **15**: 1169-1175.
- 1050 He J, Shen L, Wan M, Taranova O, Wu H, Zhang Y. 2013. Kdm2b maintains murine embryonic  
1051 stem cell status by recruiting PRC1 complex to CpG islands of developmental genes.  
1052 *Nature cell biology* **15**: 373-384.
- 1053 Ho MS, Tsai PI, Chien CT. 2006. F-box proteins: the key to protein degradation. *Journal of*  
1054 *biomedical science* **13**: 181-191.
- 1055 Hu B, Petela N, Kurze A, Chan K-L, Chapard C, Nasmyth K. 2015. Biological  
1056 chromodynamics: a general method for measuring protein occupancy across the  
1057 genome by calibrating ChIP-seq. *Nucleic acids research* **43**: e132-e132.
- 1058 Huang da W, Sherman BT, Lempicki RA. 2009. Systematic and integrative analysis of large  
1059 gene lists using DAVID bioinformatics resources. *Nat Protoc* **4**: 44-57.
- 1060 Illingworth RS, Bird AP. 2009. CpG islands--'a rough guide'. *FEBS letters* **583**: 1713-1720.
- 1061 Joshi AA, Struhl K. 2005. Eaf3 chromodomain interaction with methylated H3-K36 links  
1062 histone deacetylation to Pol II elongation. *Molecular cell* **20**: 971-978.
- 1063 Kent WJ, Sugnet CW, Furey TS, Roskin KM, Pringle TH, Zahler AM, Haussler D. 2002. The  
1064 human genome browser at UCSC. *Genome research* **12**: 996-1006.

- 1065 Keogh MC, Kurdistani SK, Morris SA, Ahn SH, Podolny V, Collins SR, Schuldiner M, Chin K,  
1066 Punna T, Thompson NJ et al. 2005. Cotranscriptional set2 methylation of histone H3  
1067 lysine 36 recruits a repressive Rpd3 complex. *Cell* **123**: 593-605.
- 1068 King HW, Fursova NA, Blackledge NP, Klose RJ. 2018. Polycomb repressive complex 1  
1069 shapes the nucleosome landscape but not accessibility at target genes. *Genome*  
1070 *research* **28**: 1494-1507.
- 1071 King HW, Klose RJ. 2017. The pioneer factor OCT4 requires the chromatin remodeller BRG1  
1072 to support gene regulatory element function in mouse embryonic stem cells. *eLife* **6**.
- 1073 Kizer KO, Phatnani HP, Shibata Y, Hall H, Greenleaf AL, Strahl BD. 2005. A Novel Domain in  
1074 Set2 Mediates RNA Polymerase II Interaction and Couples Histone H3 K36  
1075 Methylation with Transcript Elongation. *Molecular and cellular biology* **25**: 3305-3316.
- 1076 Klose RJ, Bird AP. 2006. Genomic DNA methylation: the mark and its mediators. *Trends in*  
1077 *biochemical sciences* **31**: 89-97.
- 1078 Klose RJ, Yamane K, Bae Y, Zhang D, Erdjument-Bromage H, Tempst P, Wong J, Zhang Y.  
1079 2006. The transcriptional repressor JHDM3A demethylates trimethyl histone H3 lysine  
1080 9 and lysine 36. *Nature* **442**: 312-316.
- 1081 Kouzarides T. 2007. Chromatin modifications and their function. *Cell* **128**: 693-705.
- 1082 Koyama-Nasu R, David G, Tanese N. 2007. The F-box protein Fbl10 is a novel transcriptional  
1083 repressor of c-Jun. *Nature cell biology* **9**: 1074-1080.
- 1084 Krogan NJ, Kim M, Tong A, Golshani A, Cagney G, Canadien V, Richards DP, Beattie BK,  
1085 Emili A, Boone C et al. 2003. Methylation of histone H3 by Set2 in *Saccharomyces*  
1086 *cerevisiae* is linked to transcriptional elongation by RNA polymerase II. *Molecular and*  
1087 *cellular biology* **23**: 4207-4218.
- 1088 Kuo AJ, Cheung P, Chen K, Zee BM, Kioi M, Lauring J, Xi Y, Park BH, Shi X, Garcia BA et al.  
1089 2011. NSD2 links dimethylation of histone H3 at lysine 36 to oncogenic programming.  
1090 *Molecular cell* **44**: 609-620.
- 1091 Langmead B, Salzberg SL. 2012. Fast gapped-read alignment with Bowtie 2. *Nature methods*  
1092 **9**: 357-359.
- 1093 Lee JH, Voo KS, Skalnik DG. 2001. Identification and characterization of the DNA binding  
1094 domain of CpG-binding protein. *The Journal of biological chemistry* **276**: 44669-44676.
- 1095 Li B, Carey M, Workman JL. 2007. The role of chromatin during transcription. *Cell* **128**: 707-  
1096 719.
- 1097 Li B, Howe L, Anderson S, Yates JR, 3rd, Workman JL. 2003. The Set2 histone  
1098 methyltransferase functions through the phosphorylated carboxyl-terminal domain of  
1099 RNA polymerase II. *The Journal of biological chemistry* **278**: 8897-8903.
- 1100 Li B, Jackson J, Simon MD, Fleharty B, Gogol M, Seidel C, Workman JL, Shilatifard A. 2009a.  
1101 Histone H3 lysine 36 dimethylation (H3K36me2) is sufficient to recruit the Rpd3s  
1102 histone deacetylase complex and to repress spurious transcription. *The Journal of*  
1103 *biological chemistry* **284**: 7970-7976.
- 1104 Li H, Handsaker B, Wysoker A, Fennell T, Ruan J, Homer N, Marth G, Abecasis G, Durbin R.  
1105 2009b. The Sequence Alignment/Map format and SAMtools. *Bioinformatics (Oxford,*  
1106 *England)* **25**: 2078-2079.
- 1107 Li M, Phatnani HP, Guan Z, Sage H, Greenleaf AL, Zhou P. 2005. Solution structure of the  
1108 Set2-Rpb1 interacting domain of human Set2 and its interaction with the  
1109 hyperphosphorylated C-terminal domain of Rpb1. *Proceedings of the National*  
1110 *Academy of Sciences of the United States of America* **102**: 17636-17641.
- 1111 Long HK, Blackledge NP, Klose RJ. 2013a. ZF-CxxC domain-containing proteins, CpG islands  
1112 and the chromatin connection. *Biochemical Society transactions* **41**: 727-740.
- 1113 Long HK, Sims D, Heger A, Blackledge NP, Kutter C, Wright ML, Grutzner F, Odom DT,  
1114 Patient R, Ponting CP et al. 2013b. Epigenetic conservation at gene regulatory  
1115 elements revealed by non-methylated DNA profiling in seven vertebrates. *eLife* **2**:  
1116 e00348.
- 1117 Love MI, Huber W, Anders S. 2014. Moderated estimation of fold change and dispersion for  
1118 RNA-seq data with DESeq2. *Genome Biol* **15**: 550.



- 1119 Lucio-Eterovic AK, Singh MM, Gardner JE, Veerappan CS, Rice JC, Carpenter PB. 2010.  
1120 Role for the nuclear receptor-binding SET domain protein 1 (NSD1) methyltransferase  
1121 in coordinating lysine 36 methylation at histone 3 with RNA polymerase II function.  
1122 *Proceedings of the National Academy of Sciences of the United States of America* **107**:  
1123 16952-16957.
- 1124 McDaniel SL, Strahl BD. 2017. Shaping the cellular landscape with Set2/SETD2 methylation.  
1125 *Cellular and molecular life sciences : CMLS* **74**: 3317-3334.
- 1126 Mikkelsen TS, Ku M, Jaffe DB, Issac B, Lieberman E, Giannoukos G, Alvarez P, Brockman  
1127 W, Kim TK, Koche RP et al. 2007. Genome-wide maps of chromatin state in pluripotent  
1128 and lineage-committed cells. *Nature* **448**: 553-560.
- 1129 Orlando DA, Chen MW, Brown VE, Solanki S, Choi YJ, Olson ER, Fritz CC, Bradner JE,  
1130 Guenther MG. 2014. Quantitative ChIP-Seq normalization reveals global modulation  
1131 of the epigenome. *Cell reports* **9**: 1163-1170.
- 1132 Pedersen MT, Agger K, Laugesen A, Johansen JV, Cloos PA, Christensen J, Helin K. 2014.  
1133 The demethylase JMJD2C localizes to H3K4me3-positive transcription start sites and  
1134 is dispensable for embryonic development. *Molecular and cellular biology* **34**: 1031-  
1135 1045.
- 1136 Pedersen MT, Kooistra SM, Radzisheuskaya A, Laugesen A, Johansen JV, Hayward DG,  
1137 Nilsson J, Agger K, Helin K. 2016. Continual removal of H3K9 promoter methylation  
1138 by Jmjd2 demethylases is vital for ESC self-renewal and early development. *Embo j*  
1139 **35**: 1550-1564.
- 1140 Peters AH, Kubicek S, Mechtler K, O'Sullivan RJ, Derijck AA, Perez-Burgos L, Kohlmaier A,  
1141 Opravil S, Tachibana M, Shinkai Y et al. 2003. Partitioning and plasticity of repressive  
1142 histone methylation states in mammalian chromatin. *Molecular cell* **12**: 1577-1589.
- 1143 Pokholok DK, Harbison CT, Levine S, Cole M, Hannett NM, Lee TI, Bell GW, Walker K, Rolfe  
1144 PA, Herbolsheimer E et al. 2005. Genome-wide map of nucleosome acetylation and  
1145 methylation in yeast. *Cell* **122**: 517-527.
- 1146 Quinlan AR. 2014. BEDTools: The Swiss-Army Tool for Genome Feature Analysis. *Current*  
1147 *protocols in bioinformatics* **47**: 11.12.11-34.
- 1148 Rahman S, Sowa ME, Ottinger M, Smith JA, Shi Y, Harper JW, Howley PM. 2011. The Brd4  
1149 extraterminal domain confers transcription activation independent of pTEFb by  
1150 recruiting multiple proteins, including NSD3. *Molecular and cellular biology* **31**: 2641-  
1151 2652.
- 1152 Ram O, Goren A, Amit I, Shoshani N, Yosef N, Ernst J, Kellis M, Gymrek M, Issner R, Coyne  
1153 M et al. 2011. Combinatorial patterning of chromatin regulators uncovered by genome-  
1154 wide location analysis in human cells. *Cell* **147**: 1628-1639.
- 1155 Ramírez F, Ryan DP, Grüning B, Bhardwaj V, Kilpert F, Richter AS, Heyne S, Dündar F,  
1156 Manke T. 2016. deepTools2: a next generation web server for deep-sequencing data  
1157 analysis. *Nucleic acids research* **44**: W160-W165.
- 1158 Ran FA, Hsu PD, Wright J, Agarwala V, Scott DA, Zhang F. 2013. Genome engineering using  
1159 the CRISPR-Cas9 system. *Nature Protocols* **8**: 2281.
- 1160 Robin P, Fritsch L, Philipot O, Svinarchuk F, Ait-Si-Ali S. 2007. Post-translational modifications  
1161 of histones H3 and H4 associated with the histone methyltransferases Suv39h1 and  
1162 G9a. *Genome biology* **8**: R270-R270.
- 1163 Saxonov S, Berg P, Brutlag DL. 2006. A genome-wide analysis of CpG dinucleotides in the  
1164 human genome distinguishes two distinct classes of promoters. *Proceedings of the*  
1165 *National Academy of Sciences of the United States of America* **103**: 1412-1417.
- 1166 Schaff D, Roguev A, Kotovic KM, Shevchenko A, Sarov M, Shevchenko A, Neugebauer KM,  
1167 Stewart AF. 2003. The histone 3 lysine 36 methyltransferase, SET2, is involved in  
1168 transcriptional elongation. *Nucleic acids research* **31**: 2475-2482.
- 1169 Schotta G, Sengupta R, Kubicek S, Malin S, Kauer M, Callén E, Celeste A, Pagani M, Opravil  
1170 S, De La Rosa-Velazquez IA et al. 2008. A chromatin-wide transition to H4K20  
1171 monomethylation impairs genome integrity and programmed DNA rearrangements in  
1172 the mouse. *Genes & development* **22**: 2048-2061.
- 1173 Schübeler D. 2015. Function and information content of DNA methylation. *Nature* **517**: 321.

- 1174 Shen C, Ipsaro JJ, Shi J, Milazzo JP, Wang E, Roe JS, Suzuki Y, Pappin DJ, Joshua-Tor L,  
1175 Vakoc CR. 2015. NSD3-Short Is an Adaptor Protein that Couples BRD4 to the CHD8  
1176 Chromatin Remodeler. *Molecular cell* **60**: 847-859.
- 1177 Song L, Zhang Z, Grasfeder LL, Boyle AP, Giresi PG, Lee BK, Sheffield NC, Graf S, Huss M,  
1178 Keefe D et al. 2011. Open chromatin defined by DNaseI and FAIRE identifies  
1179 regulatory elements that shape cell-type identity. *Genome research* **21**: 1757-1767.
- 1180 Spitz F, Furlong EE. 2012. Transcription factors: from enhancer binding to developmental  
1181 control. *Nature reviews Genetics* **13**: 613-626.
- 1182 Strahl BD, Grant PA, Briggs SD, Sun ZW, Bone JR, Caldwell JA, Mollah S, Cook RG,  
1183 Shabanowitz J, Hunt DF et al. 2002. Set2 is a nucleosomal histone H3-selective  
1184 methyltransferase that mediates transcriptional repression. *Molecular and cellular  
1185 biology* **22**: 1298-1306.
- 1186 Sun XJ, Wei J, Wu XY, Hu M, Wang L, Wang HH, Zhang QH, Chen SJ, Huang QH, Chen Z.  
1187 2005. Identification and characterization of a novel human histone H3 lysine 36-  
1188 specific methyltransferase. *The Journal of biological chemistry* **280**: 35261-35271.
- 1189 Suzuki E, Nakayama M. 2011. VCre/VloxP and SCre/SloxP: new site-specific recombination  
1190 systems for genome engineering. *Nucleic acids research* **39**: e49-e49.
- 1191 Tan M-KM, Lim H-J, Bennett EJ, Shi Y, Harper JW. 2013. Parallel SCF adaptor capture  
1192 proteomics reveals a role for SCFFBXL17 in NRF2 activation via BACH1 repressor  
1193 turnover. *Molecular cell* **52**: 9-24.
- 1194 Tanaka Y, Okamoto K, Teye K, Umata T, Yamagiwa N, Suto Y, Zhang Y, Tsuneoka M. 2010.  
1195 JmjC enzyme KDM2A is a regulator of rRNA transcription in response to starvation.  
1196 *Embo j* **29**: 1510-1522.
- 1197 Thomson JP, Skene PJ, Selfridge J, Clouaire T, Guy J, Webb S, Kerr AR, Deaton A, Andrews  
1198 R, James KD et al. 2010. CpG islands influence chromatin structure via the CpG-  
1199 binding protein Cfp1. *Nature* **464**: 1082-1086.
- 1200 Thurman RE, Rynes E, Humbert R, Vierstra J, Maurano MT, Haugen E, Sheffield NC,  
1201 Stergachis AB, Wang H, Vernot B et al. 2012. The accessible chromatin landscape of  
1202 the human genome. *Nature* **489**: 75-82.
- 1203 Tsukada Y, Fang J, Erdjument-Bromage H, Warren ME, Borchers CH, Tempst P, Zhang Y.  
1204 2006. Histone demethylation by a family of JmjC domain-containing proteins. *Nature*  
1205 **439**: 811-816.
- 1206 Tzatsos A, Pfau R, Kampranis SC, Tschlis PN. 2009. Ndy1/KDM2B immortalizes mouse  
1207 embryonic fibroblasts by repressing the Ink4a/Arf locus. *Proceedings of the National  
1208 Academy of Sciences of the United States of America* **106**: 2641-2646.
- 1209 Untergasser A, Cutcutache I, Koressaar T, Ye J, Faircloth BC, Remm M, Rozen SG. 2012.  
1210 Primer3--new capabilities and interfaces. *Nucleic acids research* **40**: e115-e115.
- 1211 Voo KS, Carlone DL, Jacobsen BM, Flodin A, Skalnik DG. 2000. Cloning of a mammalian  
1212 transcriptional activator that binds unmethylated CpG motifs and shares a CXXC  
1213 domain with DNA methyltransferase, human trithorax, and methyl-CpG binding domain  
1214 protein 1. *Molecular and cellular biology* **20**: 2108-2121.
- 1215 Weiner A, Hsieh T-HS, Appleboim A, Chen HV, Rahat A, Amit I, Rando OJ, Friedman N. 2015.  
1216 High-resolution chromatin dynamics during a yeast stress response. *Molecular cell* **58**:  
1217 371-386.
- 1218 Whetstine JR, Nottke A, Lan F, Huarte M, Smolikov S, Chen Z, Spooner E, Li E, Zhang G,  
1219 Colaiacovo M et al. 2006. Reversal of histone lysine trimethylation by the JMJD2 family  
1220 of histone demethylases. *Cell* **125**: 467-481.
- 1221 Wu X, Johansen JV, Helin K. 2013. Fbxl10/Kdm2b recruits polycomb repressive complex 1 to  
1222 CpG islands and regulates H2A ubiquitylation. *Molecular cell* **49**: 1134-1146.
- 1223 Xiao T, Hall H, Kizer KO, Shibata Y, Hall MC, Borchers CH, Strahl BD. 2003. Phosphorylation  
1224 of RNA polymerase II CTD regulates H3 methylation in yeast. *Genes & development*  
1225 **17**: 654-663.
- 1226 Xie L, Pelz C, Wang W, Bashar A, Varlamova O, Shadle S, Impey S. 2011. KDM5B regulates  
1227 embryonic stem cell self-renewal and represses cryptic intragenic transcription. *The  
1228 EMBO journal* **30**: 1473-1484.

1229 Yu G, Wang J, Lin X, Diao S, Cao Y, Dong R, Wang L, Wang S, Fan Z. 2016. Demethylation  
1230 of SFRP2 by histone demethylase KDM2A regulated osteo-/dentinogenic  
1231 differentiation of stem cells of the apical papilla. *Cell proliferation* **49**: 330-340.  
1232 Zhang Y, Liu T, Meyer CA, Eeckhoutte J, Johnson DS, Bernstein BE, Nusbaum C, Myers RM,  
1233 Brown M, Li W et al. 2008. Model-based Analysis of ChIP-Seq (MACS). *Genome*  
1234 *Biology* **9**: R137.

1235



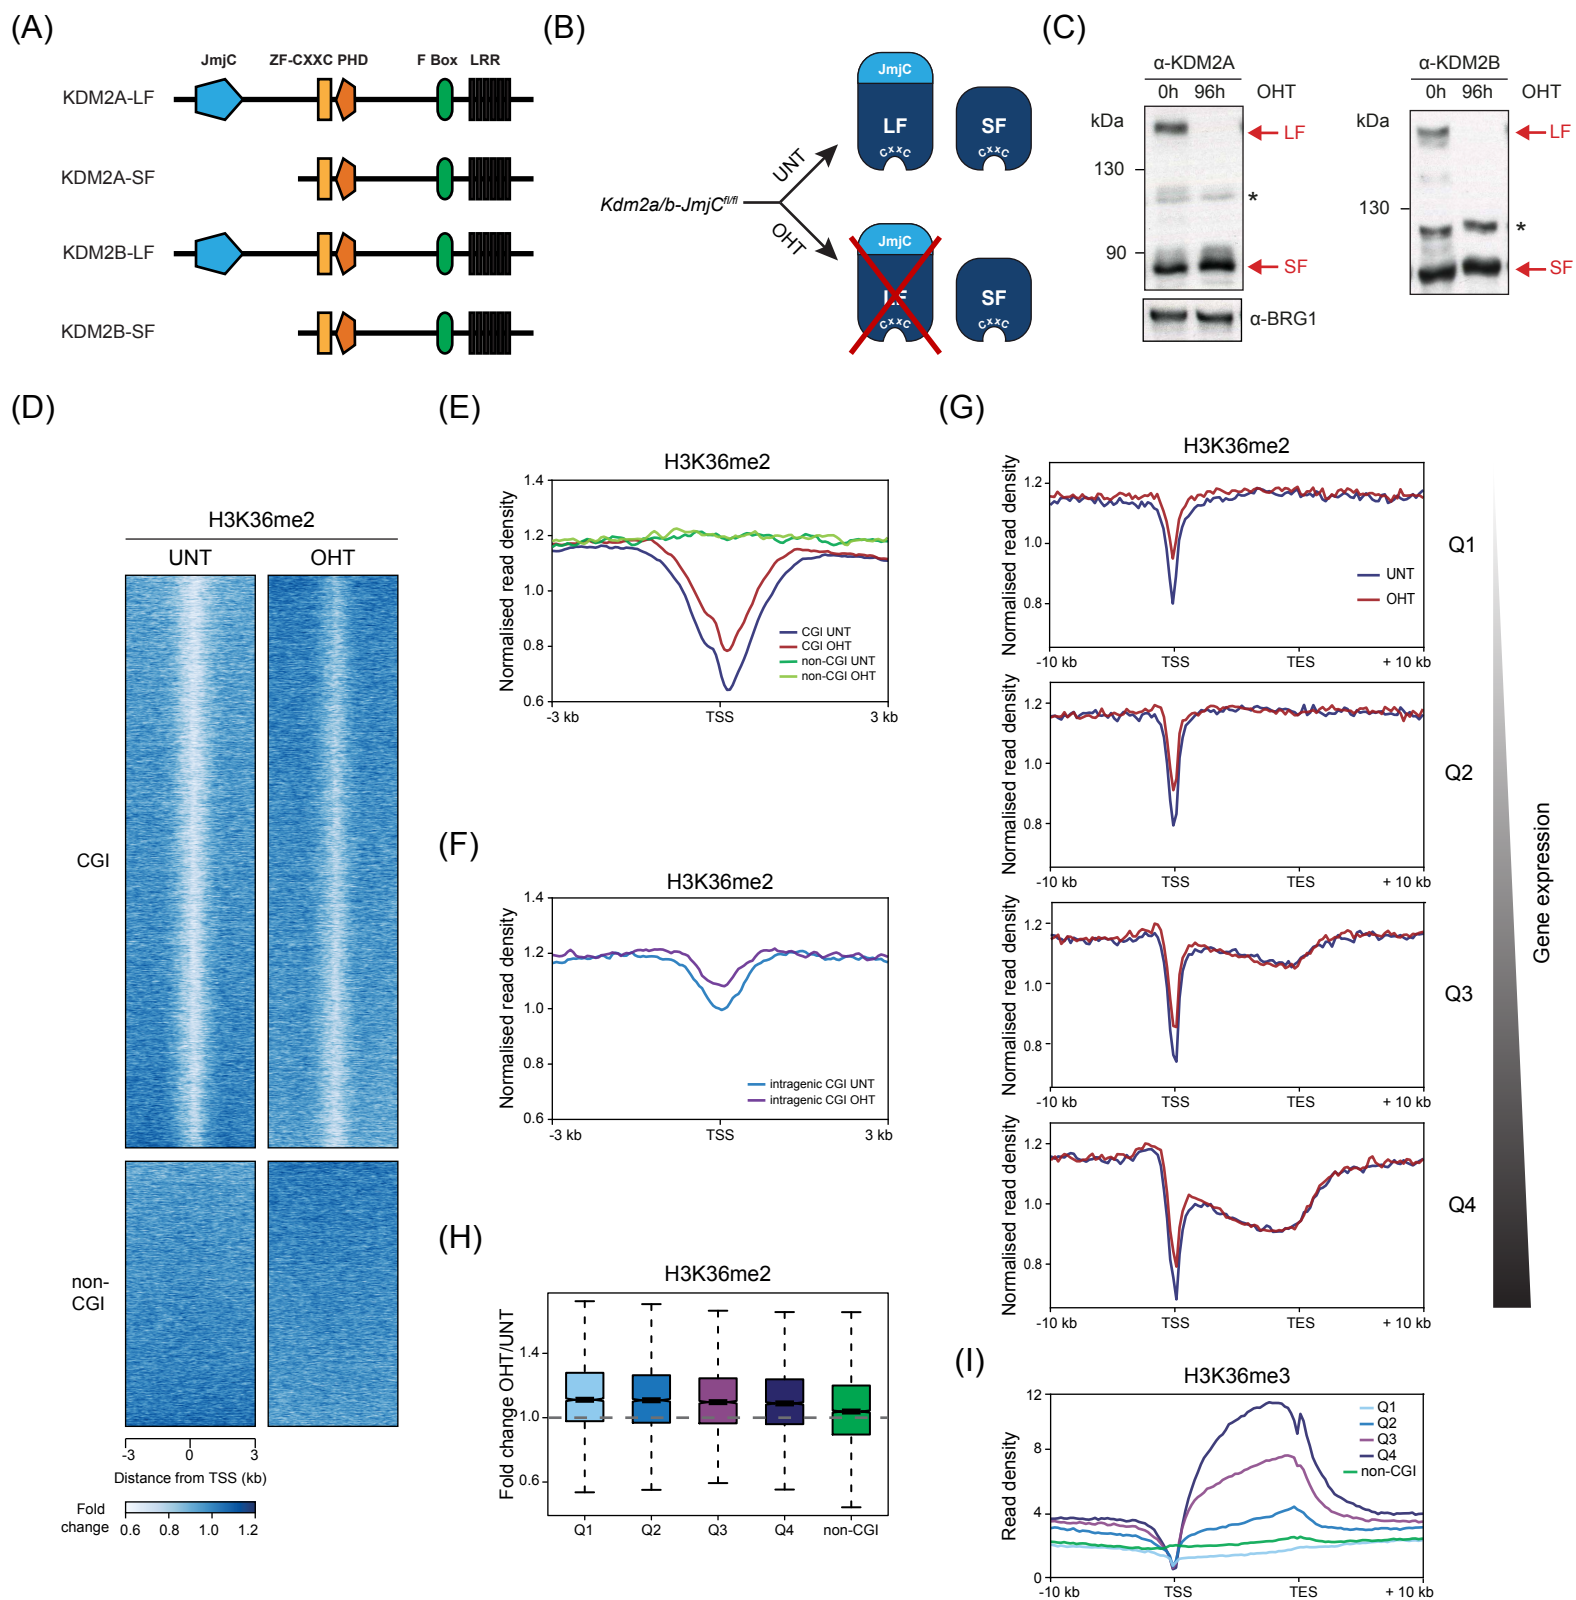

Figure 1

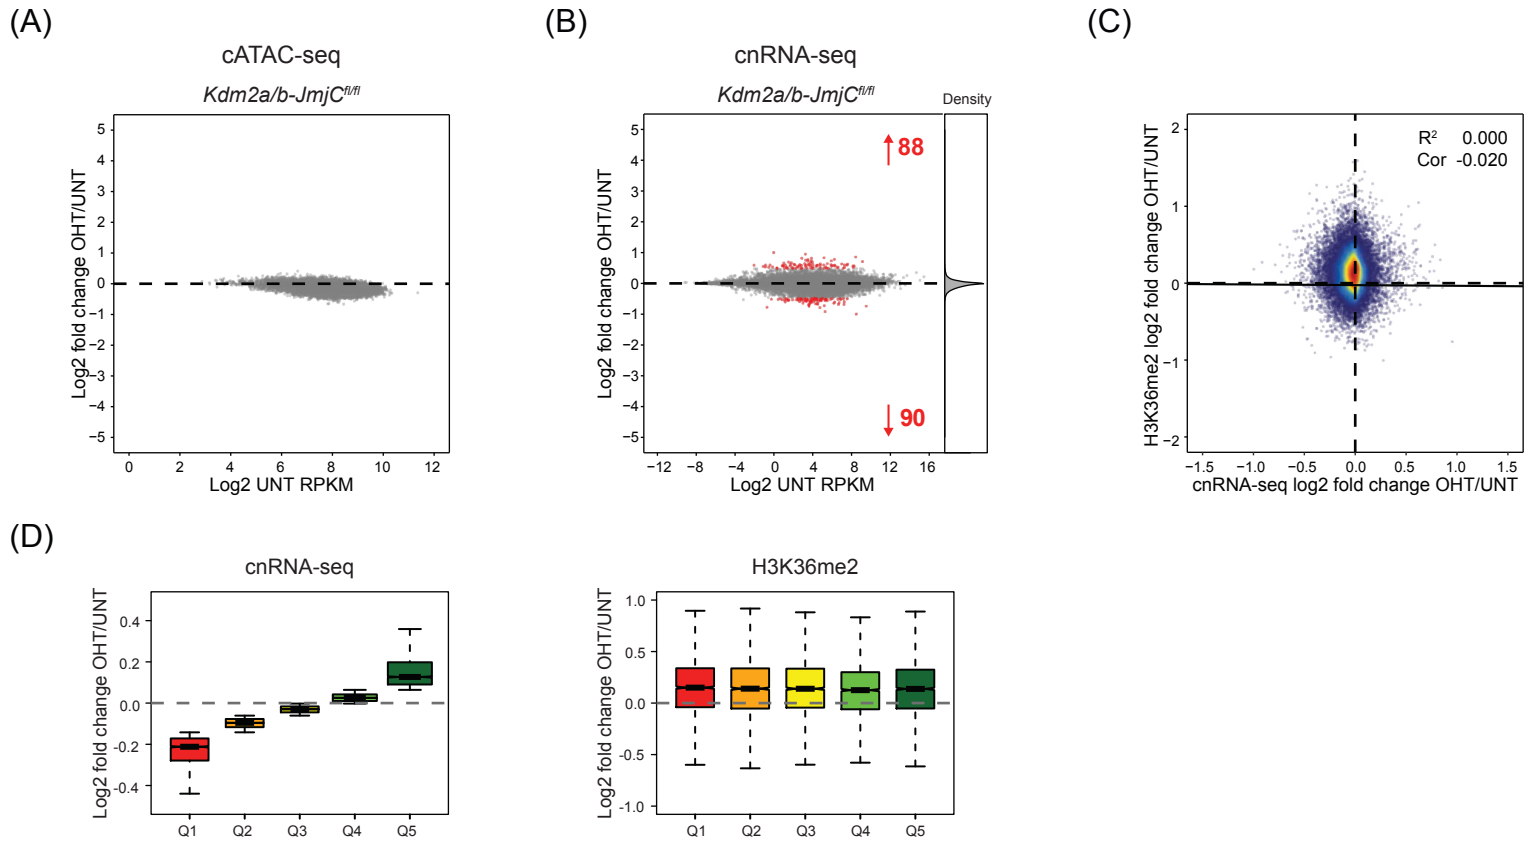

Figure 2

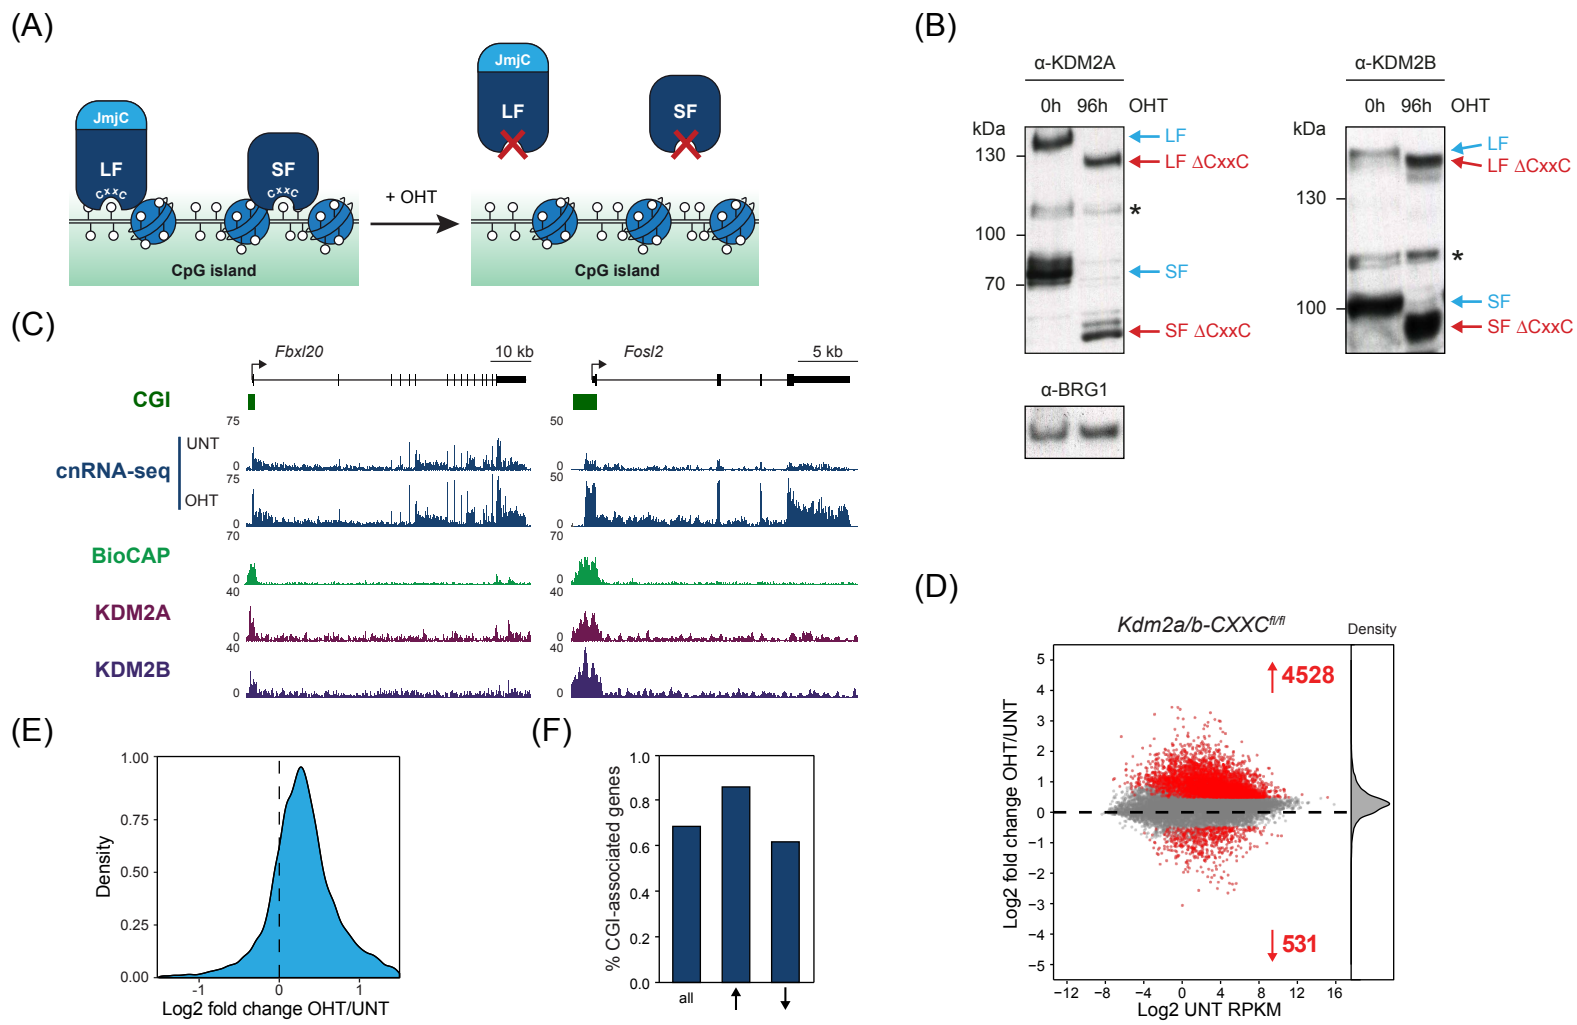

Figure 3

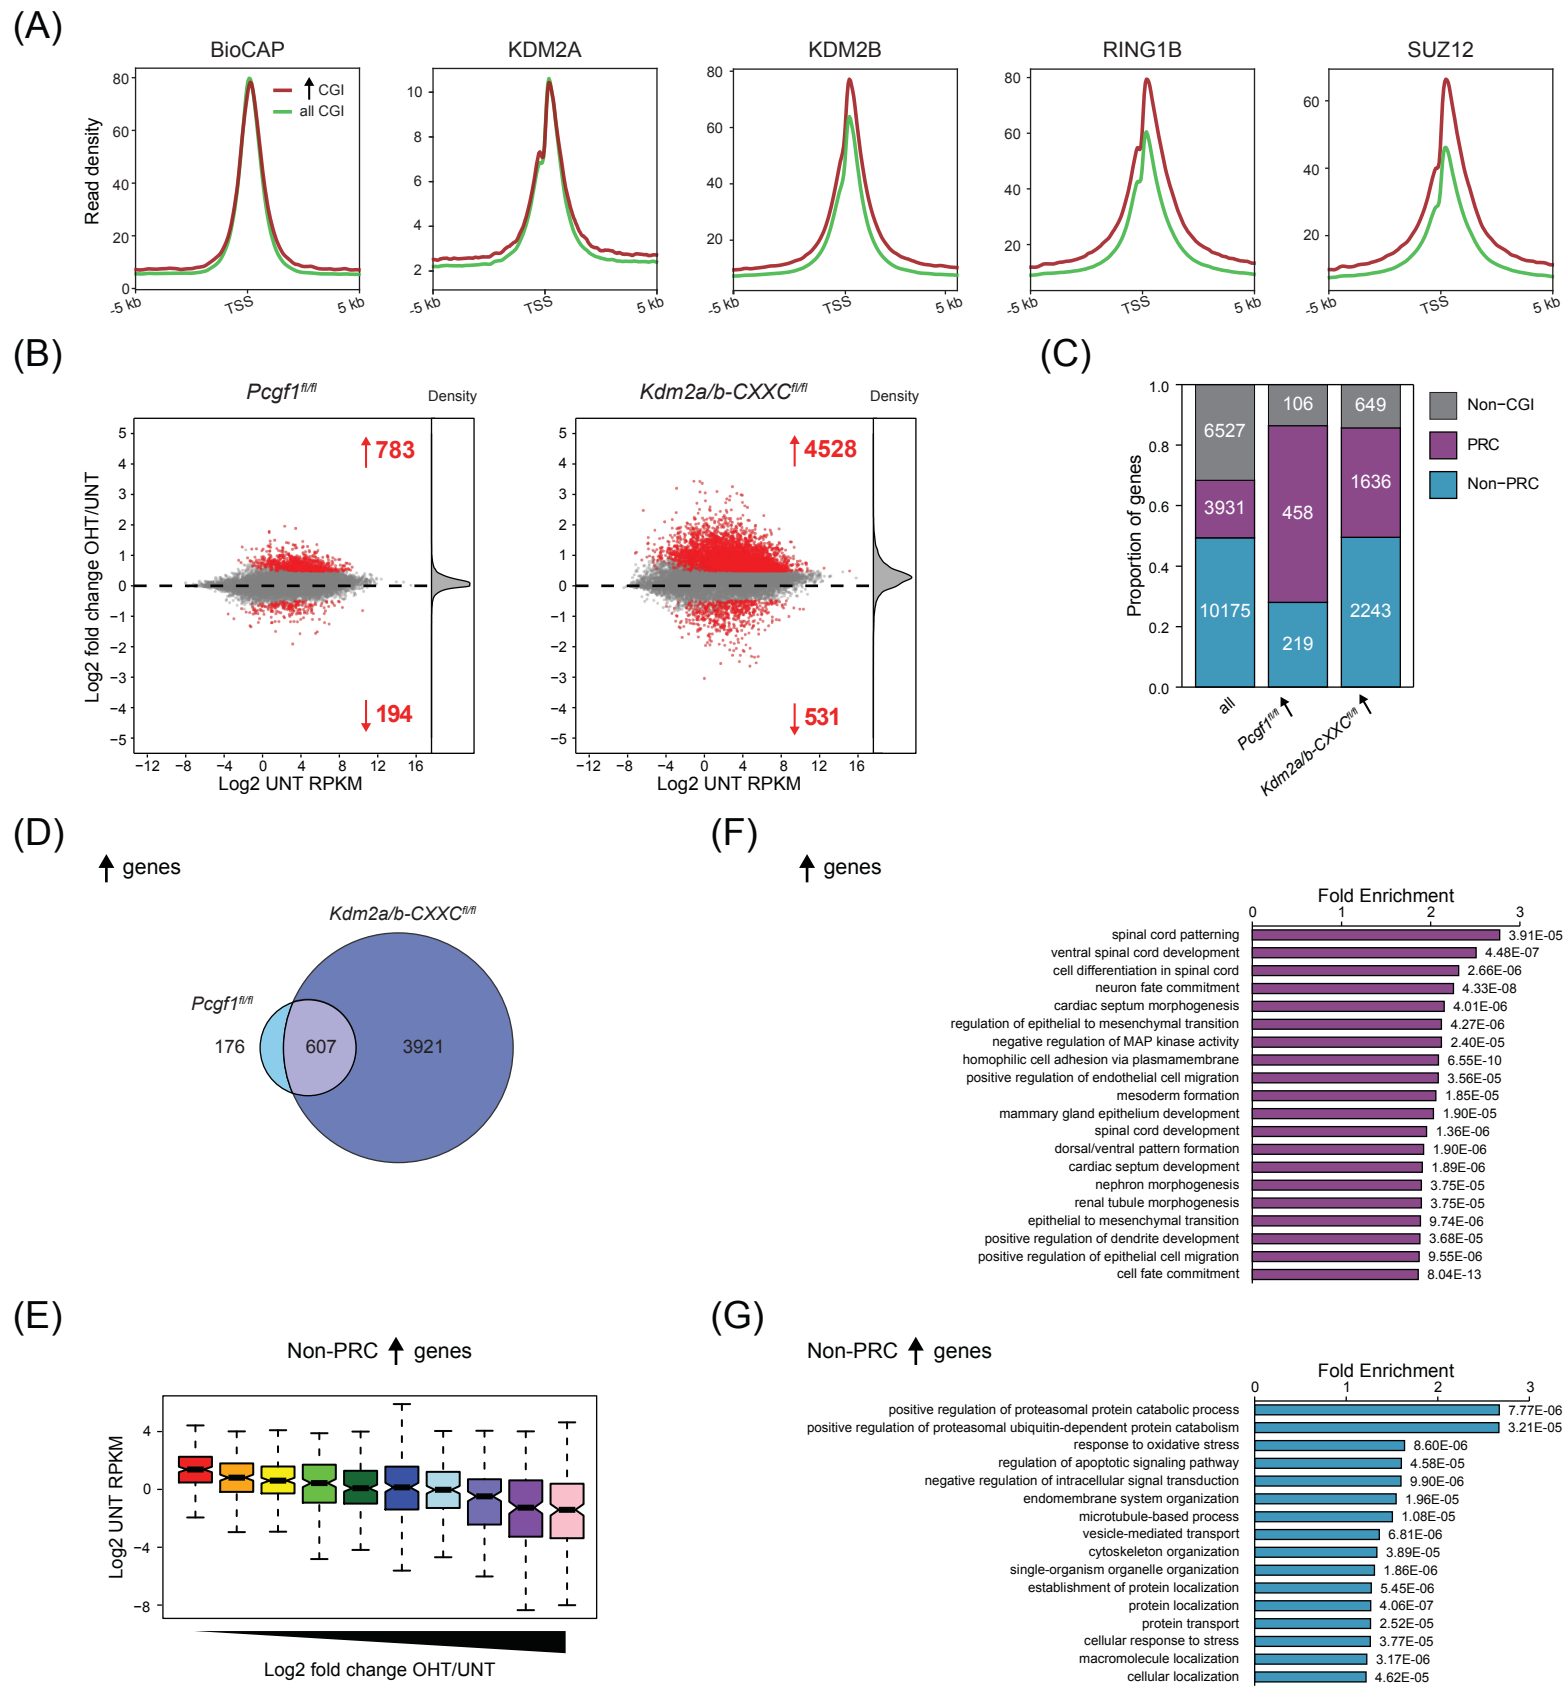

Figure 4

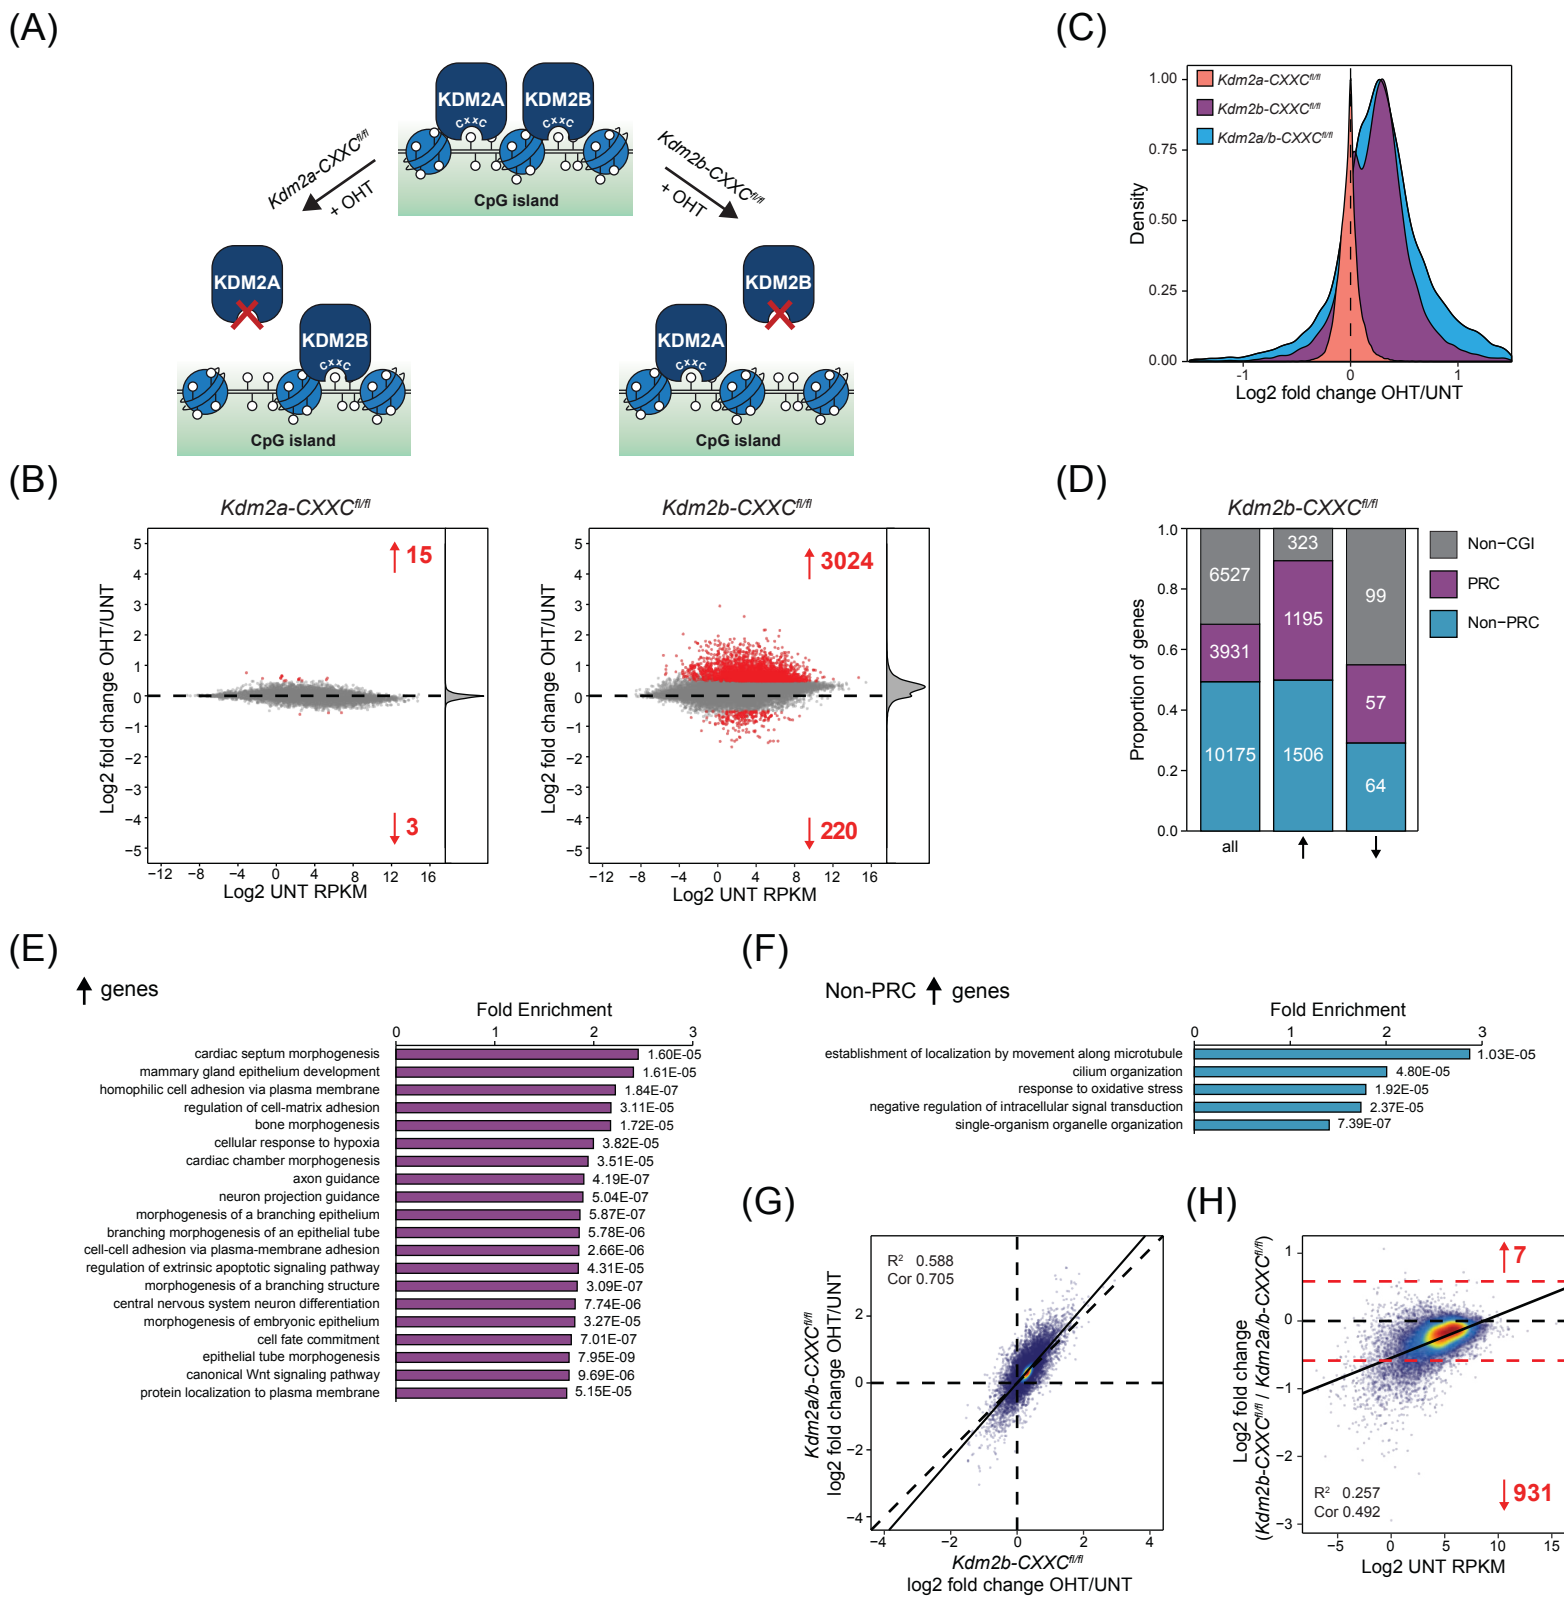

Figure 5

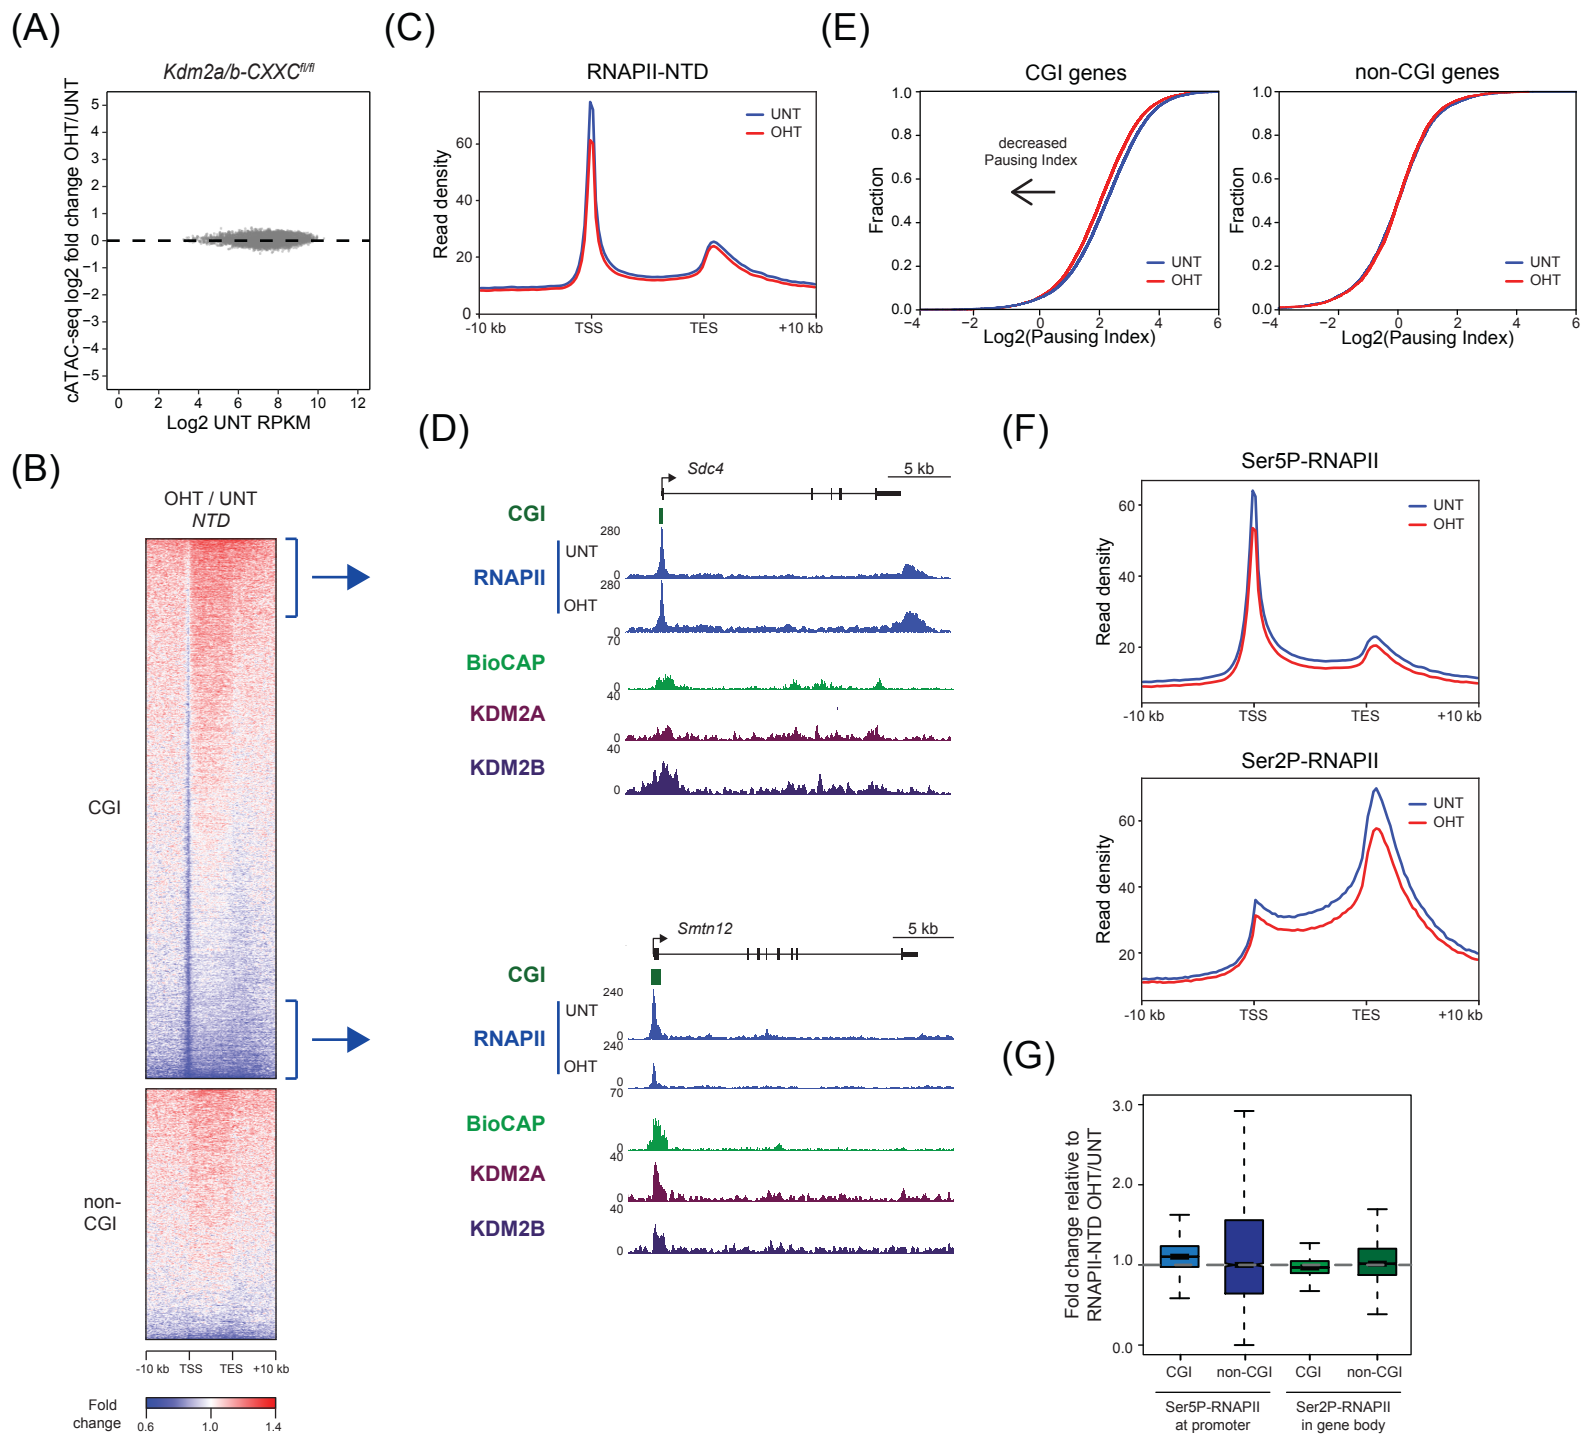

Figure 6



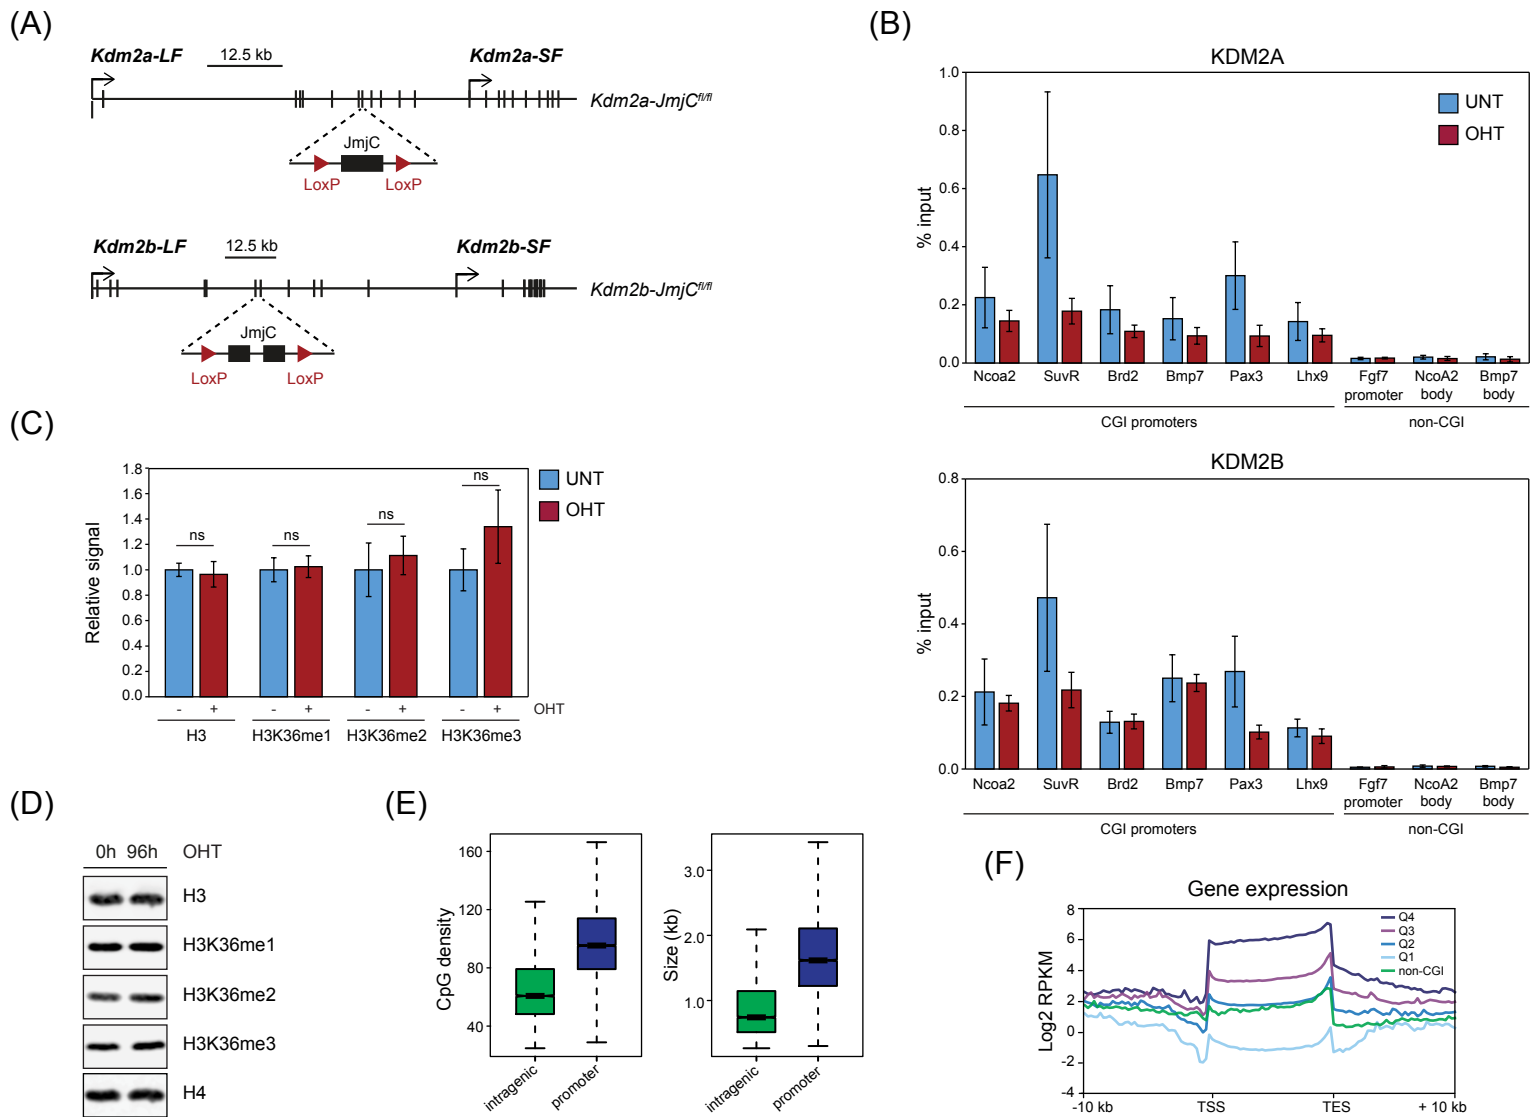

Figure S1

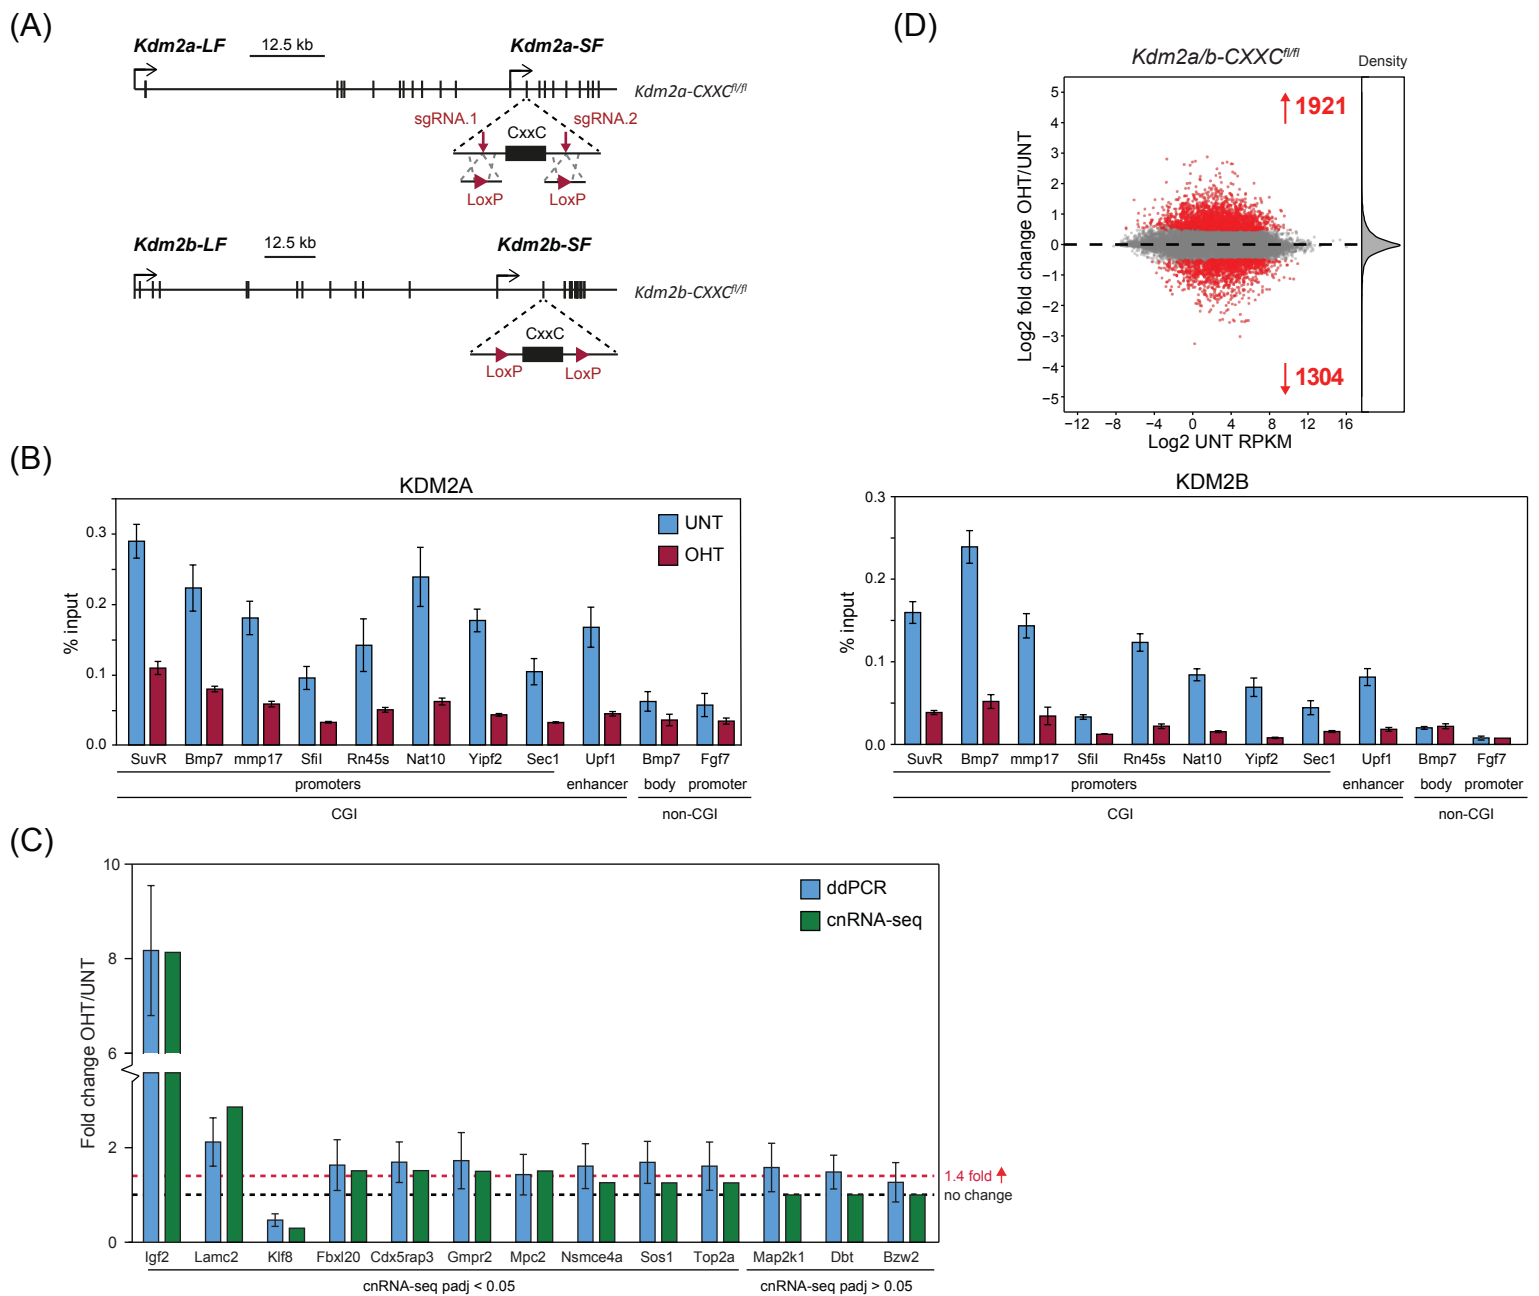

Figure S3

(A)

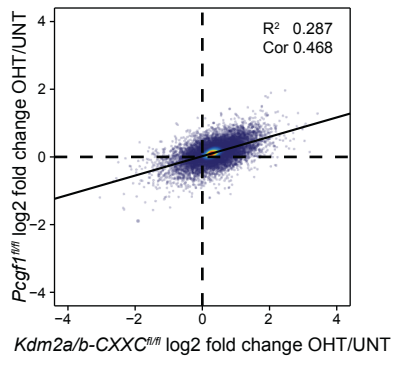

Figure S4

(A)

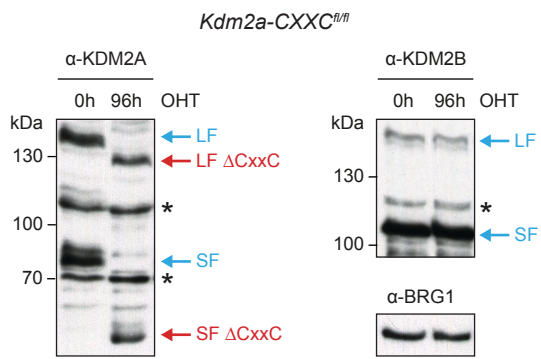

(B)

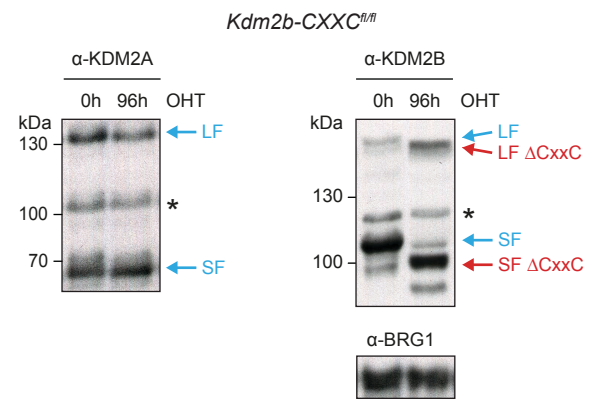

Figure S5

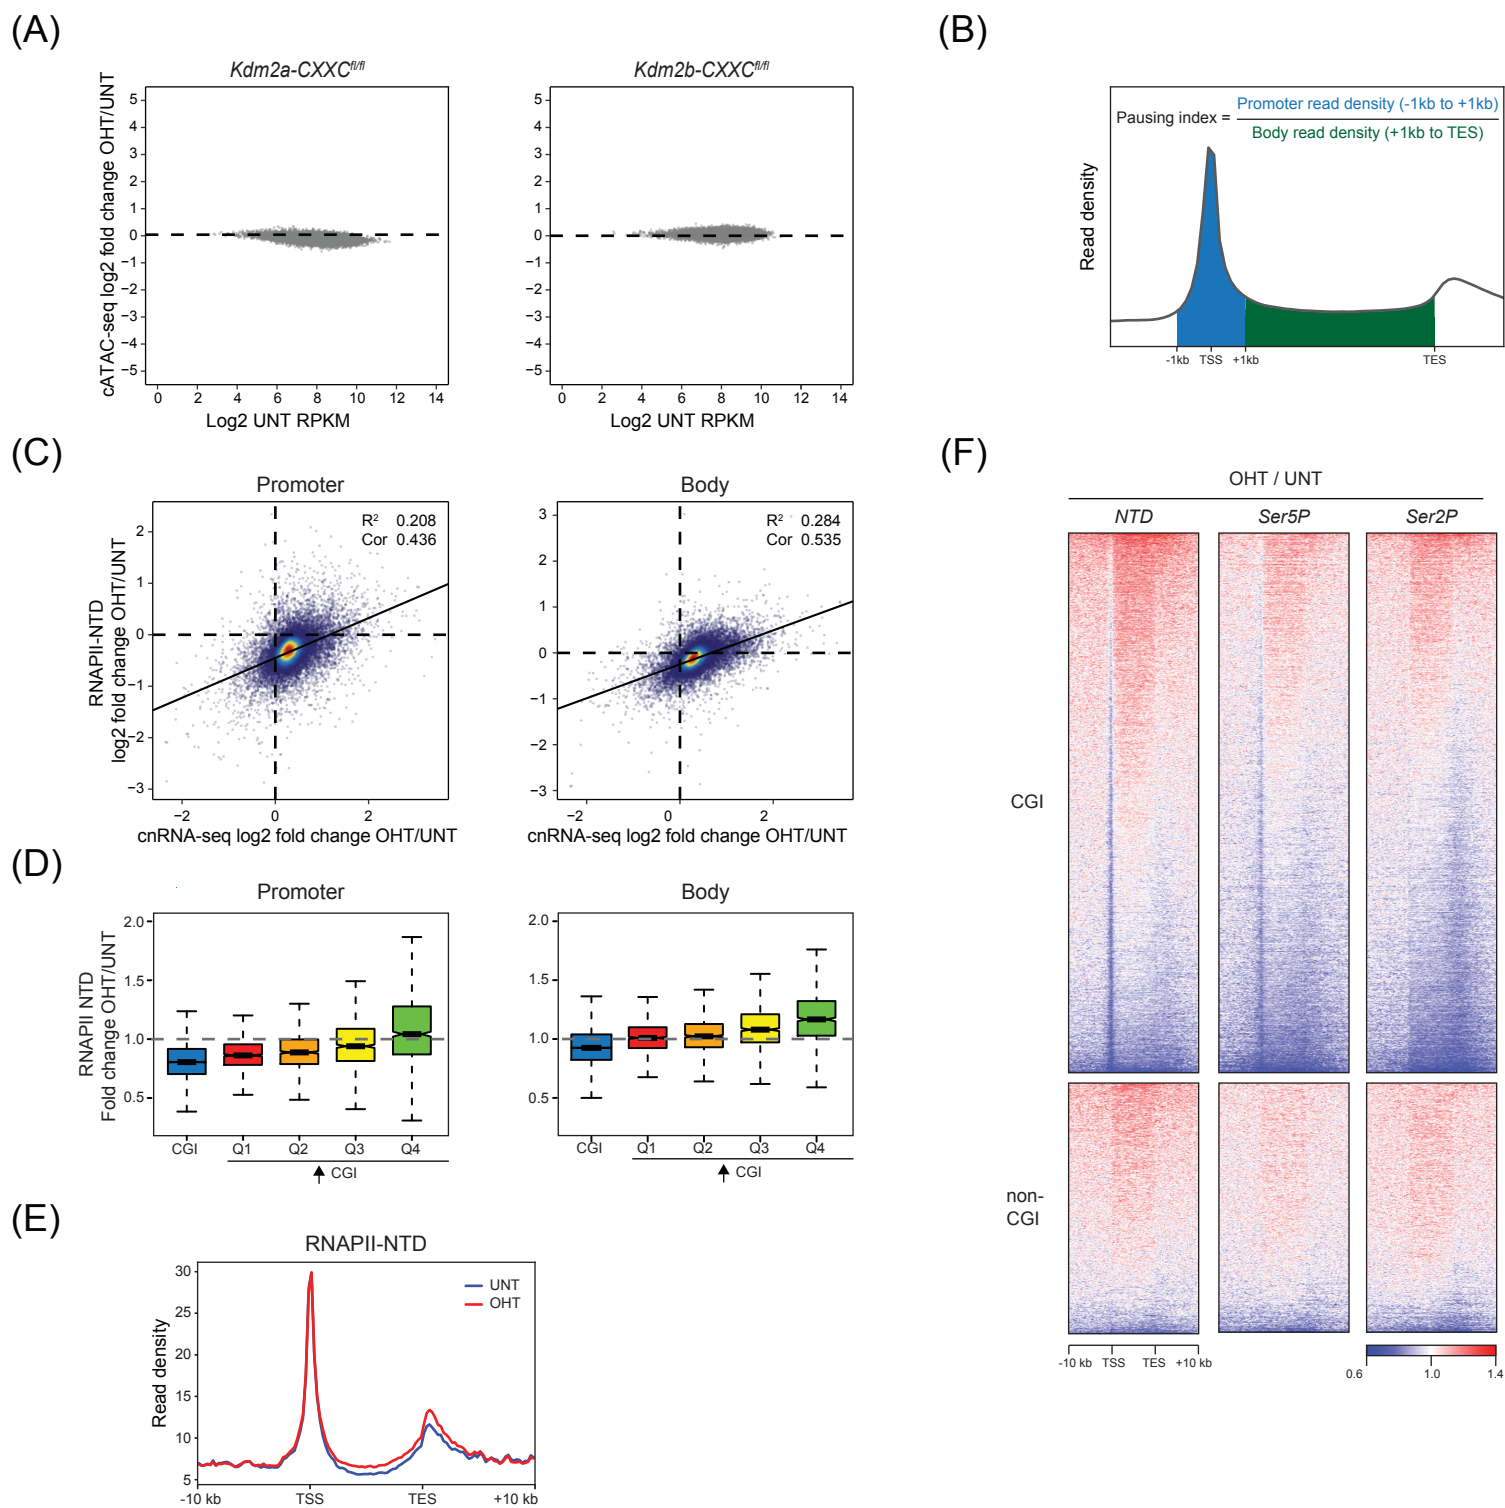

Figure S6
